# Supplementary material for: Varying Inundation Regimes Differentially Affect Natural and Sand-Amended Marsh Sediments
Source: PLoS One. 2016 Oct 27;11(10):e0164956. doi: 10.1371/journal.pone.0164956 (PMC5082819; doi:10.1371/journal.pone.0164956)
Supplement: S1 File — (XLSX) [file pone.0164956.s001.xlsx]

## Sheet: readme
The organ was planted with alterniflora on 4/26 and 4/27/11.
The organ was planted by Cathy Wigand and Karen Sundberg. 4" x 40cm inserts were used. They were prepared with two different sediments: mud and sand.
	mud= collected from the bottom of the pool and marsh mud mixed with sand. (1 bucket mud:4 bags 0.5 cuft sand.
	sand = marsh mud from the bottom of the pool mixed with sand (sandbox sand, purchased) in ratio 1 5-gallon bucket mud: 4 bags (0.5 cuft) sand.
The organ was planted withplugs 2 " diam x 6 " depth.
When facing the organ the levels are 1-6, bottom to top; the pots are 1-6, left to right.
Levels 2-6 were planted.
Each insert has a lysimeter with the porous part at 20-25 cm.
3 mud reps (level 3) did not have lysimeters until May/June sampling trip.
TREATMENTS	pot
level	1	2	3	4	5	6
6	S	M	S	M	M	S
5	S	M	S	M	M	S
4	S	S	M	M	M	S
3	S	M	M	S	M	S
2	M	M	S	S	M	S
1	X	X	X	X	X	X

## Sheet: sample log
APRIL 2011
Organ planted April 26&27, 2011
Initial plant heights measured April 29, 2011
MAY/JUNE 2011
Porewater samples collected from lysimeters on May 31, 2011 and June 1, 2011
Plant heights measured May 31, 2011
Salinity and H2S measured May 31 and June 1, 2011 at PIE
PO4 and NH4 measured June 8, 2011 at BMFL
JULY 2011
Porewater samples collected from lysimeters on July 6, 2011
Plant heights measured July 6, 2011
Cores scanned at E. Greenwich imaging lab on july 7, 2011
Cores returned to organ on July 8, 2011
Salinty & pH measured 7/6/2011 at PIE
H2S measured 7/12/2011 at BMFL
PO4 and NH4 measured 7/19/2011 at BMFL
AUGUST 2011
Porewater samples collected from lysimeters on Aug 11, 2011
Plant heights measured August 10, 2011
Salinty & pH measured 8/11/2011 at PIE
H2S measured 8/17/2011 at BMFL
PO4 and NH4 measured 8/23/2011 at BMFL
SEPTEMBER 2011
Porewater samples collected from lysimeters on Sept 13, 2011
Plant heights measured Sept 12, 2011
Plants clipped Sept 13, 2011 (taken to EPA)
Soil respiration Sept 14, 2011
Cores removed Sept 14, 2011 (taken to EPA)
Salinty & pH measured 9/13/2011 at PIE
H2S measured 10/05/2011 at BMFL
PO4 and NH4 measured 9/28/2011 at BMFL

## Sheet: porewater
BD=below detection																											August data
ns=not sampled (or not enough sample collected for that analysis)														month	day	year	ID	level	pot	treatment	Salinity	pH	H2S	uM PO4	uM NH4		treatment	level	Salinity	pH	lnh2s	lnP	lnN
														8	11	2011	2.1	2	1	m	29	7.155	477.701	67.92	36.9		m	2	29	7.155	6.17108	4.23295	3.63495
month	day	year	ID	level	pot	treatment	Salinity	pH	H2S	uM PO4	uM NH4			8	11	2011	2.2	2	2	m	28	6.97	896.279	56.56	386.56		m	2	28	6.97	6.79937	4.05283	5.95987
5	31	2011	2.1	2	1	m	ns	ns	396.2	ns	ns			8	11	2011	2.3	2	3	s	17	5.625	0	0.492	8.05		s	2	17	5.625	0	0.400118	2.20276
5	31	2011	2.2	2	2	m	ns	ns	138.2	ns	ns			8	11	2011	2.4	2	4	s	27	6.208	8.22103	0.488	43.11		s	2	27	6.208	2.22149	0.397433	3.78669
5	31	2011	2.3	2	3	s	ns	ns	BD	ns	ns			8	11	2011	2.5	2	5	m	29	7.012	520.762	59.81	206.08		m	2	29	7.012	6.25721	4.10775	5.33311
5	31	2011	2.4	2	4	s	ns	ns	BD	ns	ns			8	11	2011	2.6	2	6	s	16	5.095	0	1.015	8.075		s	2	16	5.095	0	0.700619	2.20552
5	31	2011	2.5	2	5	m	ns	ns	846.2	ns	ns			8	11	2011	3.1	3	1	s	24	5.501	0	0.162	7.13		s	3	24	5.501	0	0.150143	2.09556
5	31	2011	2.6	2	6	s	ns	ns	46.2	ns	ns			8	11	2011	3.2	3	2	m	31	7.371	535.227	61.89	37.615		m	3	31	7.371	6.28456	4.14139	3.65364
5	31	2011	3.1	3	1	s	24	ns	BD	0.438	13.758			8	11	2011	3.3	3	3	m	32	6.81	91.8399	49.5	10.855		m	3	32	6.81	4.53088	3.92197	2.47275
5	31	2011	3.2	6	2	m	ns	ns	BD	ns	ns			8	11	2011	3.4	3	4	s	28	6.516	11.4968	0.276	27.155		s	3	28	6.516	2.52547	0.24373	3.33772
5	31	2011	3.4	3	4	s	25	ns	BD	4.743	81.57			8	11	2011	3.5	3	5	m	30	7.064	269.969	110.13	40.615		m	3	30	7.064	5.602	4.7107	3.72846
5	31	2011	4.1	4	1	s	25	ns	BD	4.443	16.383			8	11	2011	3.6	3	6	s	21	4.432	0	0.27	8.085		s	3	21	4.432	0	0.239017	2.20662
5	31	2011	4.2	4	2	s	24.5	ns	BD	0.87	11.328			8	11	2011	4.1	4	1	s	22	4.539	0	0.26	8.105		s	4	22	4.539	0	0.231112	2.20882
5	31	2011	4.3	4	3	m	27	ns	1156.2	80.0865	371.562			8	11	2011	4.2	4	2	s	17	4.787	0	0.111	7.955		s	4	17	4.787	0	0.105261	2.19221
5	31	2011	4.4	4	4	m	ns	ns	1092.2	ns	ns			8	11	2011	4.3	4	3	m	29	7.696	434.473	69.09	522.14		m	4	29	7.696	6.07643	4.24978	6.25985
5	31	2011	4.5	4	5	m	26	ns	402.2	50.024	408.789			8	11	2011	4.4	4	4	m	35	7.176	68.6697	45.37	17.875		m	4	35	7.176	4.24377	3.83665	2.93784
5	31	2011	4.6	4	6	s	25	ns	BD	2.196	23.169			8	11	2011	4.5	4	5	m	32.5	6.64	398.603	42.45	11.735		m	4	32.5	6.64	5.99047	3.77161	2.54435
5	31	2011	5.1	5	1	s	ns	ns	58.2	ns	ns			8	11	2011	4.6	4	6	s	15	4.384	0	0.369	8.39		s	4	15	4.384	0	0.314081	2.23965
5	31	2011	5.2	5	2	m	26	ns	66.2	32.8745	284.064			8	11	2011	5.1	5	1	s	18	5.939	0	0.237	7.56		s	5	18	5.939	0	0.212689	2.1471
5	31	2011	5.4	5	4	m	27.5	ns	40.2	12.48	207.09			8	11	2011	5.2	5	2	m	33	7.04	56.6851	32.8	15.425		m	5	33	7.04	4.055	3.52046	2.7988
5	31	2011	5.6	5	6	s	ns	ns	BD	ns	ns			8	11	2011	5.3	5	3	s	19	6.074	0	0.259	9.665		s	5	19	6.074	0	0.230318	2.36697
6	1	2011	2.1	2	1	m	26	ns	482.2	54.649	392.85			8	11	2011	5.4	5	4	m	34	7.309	150.758	32	9.055		m	5	34	7.309	5.02228	3.49651	2.30807
6	1	2011	2.2	2	2	m	28	ns	2.2	156.048	463.134			8	11	2011	5.5	5	5	m	34	6.51	9.33959	8.313	10.01		m	5	34	6.51	2.33598	2.23141	2.3988
6	1	2011	2.3	2	3	s	26	ns	BD	3.306	50.214			8	11	2011	5.6	5	6	s	19	5.745	0	0.282	9.17		s	5	19	5.745	0	0.248421	2.31944
6	1	2011	2.4	2	4	s	23	ns	BD	0.438	44.565			8	11	2011	6.1	6	1	s	20	3.99	0	0.829	7.02		s	6	20	3.99	0	0.603769	2.08194
6	1	2011	2.5	2	5	m	27	ns	438.2	79.994	308.853			8	11	2011	6.2	6	2	m	34	6.464	0	0.211	8.63		m	6	34	6.464	0	0.191446	2.26488
6	1	2011	2.6	2	6	s	24	ns	BD	1.473	66.051			8	11	2011	6.3	6	3	s	12	4.546	0	0.441	37.96		s	6	12	4.546	0	0.365337	3.66254
6	1	2011	3.1	3	1	s	24	ns	BD	1.356	72.747			8	11	2011	6.4	6	4	m	38	6.28	66.6259	2.063	10.245		m	6	38	6.28	4.21399	1.11939	2.41992
6	1	2011	3.2	3	2	m	ns	ns	156.2	ns	ns			8	11	2011	6.5	6	5	m	37	5.638	1.90915	0.227	8.735		m	6	37	5.638	1.06786	0.204572	2.27573
6	1	2011	3.3	3	3	m	ns	ns	90.2	ns	ns			8	11	2011	6.6	6	6	s	13	4.11	0	0.298	7.315		s	6	13	4.11	0	0.260825	2.11806
6	1	2011	3.4	3	4	s	24	ns	BD	0.264	5.253
6	1	2011	3.5	3	5	m	ns	ns	14.2	ns	ns
6	1	2011	3.6	3	6	s	25	ns	BD	0.276	5.382
6	1	2011	4.1	4	1	s	25	ns	BD	1.329	4.584
6	1	2011	4.2	4	2	s	24	ns	BD	0.645	3.6
6	1	2011	4.3	4	3	m	27	ns	626.2	ns	ns
6	1	2011	4.4	4	4	m	29	ns	536.2	ns	ns
6	1	2011	4.5	4	5	m	26	ns	BD	9.279	352.05
6	1	2011	4.6	4	6	s	25	ns	BD	0.972	5.667
6	1	2011	5.2	5	2	m	27	ns	BD	8.343	228.573
6	1	2011	5.5	5	5	m	26	ns	BD	3.642	84.954
6	1	2011	6.2	6	2	m	29	ns	BD	0.903	7.758
6	1	2011	6.4	6	4	m	ns	ns	BD	ns	ns
7	6	2011	2.1	2	1	m	26	7.04	306.458	72.77	224.88
7	6	2011	2.2	2	2	m	30	7.54	866.663	104.75	719.42
7	6	2011	2.3	2	3	s	21	4.68	BD	1.227	8.19
7	6	2011	2.4	2	4	s	25	5.85	BD	0.865	57.285
7	6	2011	2.5	2	5	m	29	7.7	766.471	75.19	389.32
7	6	2011	2.6	2	6	s	20	4.09	BD	0.864	11.395
7	6	2011	3.1	3	1	s	22	5.06	BD	1.45	7.1
7	6	2011	3.2	3	2	m	29	7.46	258.54	92.74	32.12
7	6	2011	3.3	3	3	m	29	7.19	430.173	60.39	193.69
7	6	2011	3.4	3	4	s	25	6.46	BD	0.681	22.03
7	6	2011	3.5	3	5	m	28	7.67	813.518	76.04	155.84
7	6	2011	3.6	3	6	s	23	4.3	BD	0.496	14.775
7	6	2011	4.1	4	1	s	20	3.64	BD	0.534	13.92
7	6	2011	4.2	4	2	s	21	3.71	BD	0.426	7.39
7	6	2011	4.3	4	3	m	28	7.67	871.019	90.84	627.34
7	6	2011	4.4	4	4	m	29	7.55	445.856	82.23	47.85
7	6	2011	4.5	4	5	m	27	6.41	320.398	23.58	16.41
7	6	2011	4.6	4	6	s	22	3.69	BD	0.688	11.695
7	6	2011	5.1	5	1	s	22	4.36	BD	0.779	15.855
7	6	2011	5.2	5	2	m	28	6.9	47.6349	48.91	147.01
7	6	2011	5.3	5	3	s	21	4.63	BD	0.425	7.21
7	6	2011	5.4	5	4	m	28	7.02	857.951	54.47	140.56
7	6	2011	5.5	5	5	m	28	6.5	205.394	1.64	11.34
7	6	2011	5.6	5	6	s	23	3.8	BD	0.612	7.04
7	6	2011	6.1	6	1	s	22	3.7	BD	0.548	10.92
7	6	2011	6.2	6	2	m	25	6.6	BD	3.71	12.09
7	6	2011	6.3	6	3	s	17	3.8	BD	1.002	1065.12
7	6	2011	6.4	6	4	m	29	6.35	13.5478	1.33	34.56
7	6	2011	6.5	6	5	m	26	6.27	42.1462	1.61	18.65
7	6	2011	6.6	6	6	s	22	3.72	BD	0.458	18.895
8	11	2011	2.1	2	1	m	29	7.155	477.701	67.92	36.9
8	11	2011	2.2	2	2	m	28	6.97	896.279	56.56	386.56
8	11	2011	2.3	2	3	s	17	5.625	BD	0.492	8.05
8	11	2011	2.4	2	4	s	27	6.208	8.22103	0.488	43.11
8	11	2011	2.5	2	5	m	29	7.012	520.762	59.81	206.08
8	11	2011	2.6	2	6	s	16	5.095	BD	1.015	8.075
8	11	2011	3.1	3	1	s	24	5.501	BD	0.162	7.13
8	11	2011	3.2	3	2	m	31	7.371	535.227	61.89	37.615
8	11	2011	3.3	3	3	m	32	6.81	91.8399	49.5	10.855
8	11	2011	3.4	3	4	s	28	6.516	11.4968	0.276	27.155
8	11	2011	3.5	3	5	m	30	7.064	269.969	110.13	40.615
8	11	2011	3.6	3	6	s	21	4.432	BD	0.27	8.085
8	11	2011	4.1	4	1	s	22	4.539	BD	0.26	8.105
8	11	2011	4.2	4	2	s	17	4.787	BD	0.111	7.955
8	11	2011	4.3	4	3	m	29	7.696	434.473	69.09	522.14
8	11	2011	4.4	4	4	m	35	7.176	68.6697	45.37	17.875
8	11	2011	4.5	4	5	m	32.5	6.64	398.603	42.45	11.735
8	11	2011	4.6	4	6	s	15	4.384	BD	0.369	8.39
8	11	2011	5.1	5	1	s	18	5.939	BD	0.237	7.56
8	11	2011	5.2	5	2	m	33	7.04	56.6851	32.8	15.425
8	11	2011	5.3	5	3	s	19	6.074	BD	0.259	9.665
8	11	2011	5.4	5	4	m	34	7.309	150.758	32	9.055
8	11	2011	5.5	5	5	m	34	6.51	9.33959	8.313	10.01
8	11	2011	5.6	5	6	s	19	5.745	BD	0.282	9.17
8	11	2011	6.1	6	1	s	20	3.99	BD	0.829	7.02
8	11	2011	6.2	6	2	m	34	6.464	BD	0.211	8.63
8	11	2011	6.3	6	3	s	12	4.546	BD	0.441	37.96
8	11	2011	6.4	6	4	m	38	6.28	66.6259	2.063	10.245
8	11	2011	6.5	6	5	m	37	5.638	1.90915	0.227	8.735
8	11	2011	6.6	6	6	s	13	4.11	BD	0.298	7.315
9	13	2011	2.1	2	1	m	29	7.5	498.21	73.11	24.59
9	13	2011	2.2	2	2	m	30	7.612	58.8716	99.5	566.35
9	13	2011	2.3	2	3	s	23	5.628	BD	4.093	4.67
9	13	2011	2.4	2	4	s	25	6.293	5.59942	1.117	20.55
9	13	2011	2.5	2	5	m	30	7.187	101.234	55.52	108.645
9	13	2011	2.6	2	6	s	25	5.853	41.6609	0.687	6.285
9	13	2011	3.1	3	1	s	25	5.954	BD	0.184	1.94
9	13	2011	3.2	3	2	m	30	6.899	44.6975	36.39	7.645
9	13	2011	3.3	3	3	m	31	7.494	18.8976	30.11	2.76
9	13	2011	3.4	3	4	s	25	6.307	8.7846	0.466	1.505
9	13	2011	3.5	3	5	m	30	7.53	107.207	106.632	41.145
9	13	2011	3.6	3	6	s	24	5.756	BD	0.192	3.61
9	13	2011	4.1	4	1	s	21	5.73	BD	0.338	2.585
9	13	2011	4.2	4	2	s	24	5.854	BD	0.093	7
9	13	2011	4.3	4	3	m	30	7.684	50.5901	76.97	52.12
9	13	2011	4.4	4	4	m	34	7.204	3.68831	22.18	3.285
9	13	2011	4.5	4	5	m	32	6.604	6.0772	1.16	1.365
9	13	2011	4.6	4	6	s	23	4.835	BD	0.097	2.41
9	13	2011	5.1	5	1	s	23	6.383	BD	1.449	1.59
9	13	2011	5.2	5	2	m	30	6.903	4.96238	2.16	2.35
9	13	2011	5.3	5	3	s	24	6.24	BD	0.217	1.265
9	13	2011	5.4	5	4	m	30	7.657	63.9571	21.3	1.9
9	13	2011	5.5	5	5	m	30	6.708	2.49387	0.187	3.18
9	13	2011	5.6	5	6	s	24	6.206	BD	0.184	1.475
9	13	2011	6.1	6	1	s	20	5.687	BD	0.313	2.24
9	13	2011	6.2	6	2	m	29	6.405	BD	0.092	1.725
9	13	2011	6.3	6	3	s	21	5.921	BD	0.551	2.1
9	13	2011	6.4	6	4	m	30	6.386	BD	0.184	3.145
9	13	2011	6.5	6	5	m	31	6.089	1.69757	0.133	1.675
9	13	2011	6.6	6	6	s	20	4.962	BD	0.124	5.18

## Sheet: biomass clipped
data from Wigand
plants clipped 9/13/2014
				dry weight (g)
ID	level	pot	treatment	dead	live	total
2.1	2	1	m	0.4121	3.149	3.5611
2.2	2	2	m	0.209	2.781	2.99
2.3	2	3	s	0.3319	2.432	2.7639
2.4	2	4	s	0.122	0.99	1.112
2.5	2	5	m	0.2794	2.32	2.5994
2.6	2	6	s	0.3739	1.799	2.1729
3.1	3	1	s	0.4768	1.726	2.2028
3.2	3	2	m	0.6067	3.121	3.7277
3.3	3	3	m	0.5714	4.606	5.1774
3.4	3	4	s	0.3354	1.713	2.0484
3.5	3	5	m	0.3582	3.3	3.6582
3.6	3	6	s	0.136	2.74	2.876
4.1	4	1	s	0.3834	3.343	3.7264
4.2	4	2	s	0.5106	3.016	3.5266
4.3	4	3	m	0.6202	2.213	2.8332
4.4	4	4	m	0.7905	6.54	7.3305
4.5	4	5	m	0.546	4.682	5.228
4.6	4	6	s	0.2643	2.447	2.7113
5.1	5	1	s	0.7896	2.562	3.3516
5.2	5	2	m	0.4958	3.294	3.7898
5.3	5	3	s	0.4701	3.167	3.6371
5.4	5	4	m	0.2665	3.636	3.9025
5.5	5	5	m	0.3594	3.561	3.9204
5.6	5	6	s	0.2908	2.336	2.6268
6.1	6	1	s	0.3711	2.832	3.2031
6.2	6	2	m	1.1491	2.599	3.7481
6.3	6	3	s	0.3711	2.171	2.5421
6.4	6	4	m	0.8495	3.681	4.5305
6.5	6	5	m	0.3487	2.838	3.1867
6.6	6	6	s	0.3233	2.414	2.7373

## Sheet: individual plant ht
flowering plants noted under comments (august only)
species	mm	dd	yyyy	level	rep	treatment	plantht (cm)	comments
S. alterniflora	4	29	2011	2	1	mud	4
S. alterniflora	4	29	2011	2	1	mud	5
S. alterniflora	4	29	2011	2	1	mud	5
S. alterniflora	4	29	2011	2	1	mud	2
S. alterniflora	4	29	2011	2	1	mud	6
S. alterniflora	4	29	2011	2	1	mud	4
S. alterniflora	4	29	2011	2	1	mud	6
S. alterniflora	4	29	2011	2	1	mud	4
S. alterniflora	4	29	2011	2	2	mud	4
S. alterniflora	4	29	2011	2	2	mud	4
S. alterniflora	4	29	2011	2	2	mud	5
S. alterniflora	4	29	2011	2	2	mud	8
S. alterniflora	4	29	2011	2	2	mud	5
S. alterniflora	4	29	2011	2	3	sand	2
S. alterniflora	4	29	2011	2	3	sand	3
S. alterniflora	4	29	2011	2	3	sand	4
S. alterniflora	4	29	2011	2	3	sand	5
S. alterniflora	4	29	2011	2	4	sand	9	patens
S. alterniflora	4	29	2011	2	4	sand	4	patens
S. alterniflora	4	29	2011	2	5	mud	9
S. alterniflora	4	29	2011	2	5	mud	6
S. alterniflora	4	29	2011	2	5	mud	5
S. alterniflora	4	29	2011	2	6	sand	4
S. alterniflora	4	29	2011	2	6	sand	7
S. alterniflora	4	29	2011	2	6	sand	7
S. alterniflora	4	29	2011	2	6	sand	7
S. alterniflora	4	29	2011	2	6	sand	5
S. alterniflora	4	29	2011	2	6	sand	4
S. alterniflora	4	29	2011	3	1	sand	5
S. alterniflora	4	29	2011	3	1	sand	7
S. alterniflora	4	29	2011	3	1	sand	3
S. alterniflora	4	29	2011	3	1	sand	4
S. alterniflora	4	29	2011	3	2	mud	8
S. alterniflora	4	29	2011	3	2	mud	8
S. alterniflora	4	29	2011	3	2	mud	9
S. alterniflora	4	29	2011	3	2	mud	7
S. alterniflora	4	29	2011	3	2	mud	9
S. alterniflora	4	29	2011	3	2	mud	6
S. alterniflora	4	29	2011	3	3	mud	7
S. alterniflora	4	29	2011	3	3	mud	4
S. alterniflora	4	29	2011	3	3	mud	5
S. alterniflora	4	29	2011	3	3	mud	5
S. alterniflora	4	29	2011	3	4	sand	6
S. alterniflora	4	29	2011	3	4	sand	5
S. alterniflora	4	29	2011	3	4	sand	5
S. alterniflora	4	29	2011	3	4	sand	3
S. alterniflora	4	29	2011	3	4	sand	2
S. alterniflora	4	29	2011	3	5	mud	5
S. alterniflora	4	29	2011	3	5	mud	8
S. alterniflora	4	29	2011	3	5	mud	6
S. alterniflora	4	29	2011	3	5	mud	6
S. alterniflora	4	29	2011	3	5	mud	2
S. alterniflora	4	29	2011	3	5	mud	5
S. alterniflora	4	29	2011	3	5	mud	4
S. alterniflora	4	29	2011	3	6	sand	9
S. alterniflora	4	29	2011	3	6	sand	7
S. alterniflora	4	29	2011	3	6	sand	3
S. alterniflora	4	29	2011	3	6	sand	3
S. alterniflora	4	29	2011	3	6	sand	5
S. alterniflora	4	29	2011	4	1	sand	4
S. alterniflora	4	29	2011	4	1	sand	5
S. alterniflora	4	29	2011	4	1	sand	4
S. alterniflora	4	29	2011	4	1	sand	3
S. alterniflora	4	29	2011	4	1	sand	5
S. alterniflora	4	29	2011	4	1	sand	5
S. alterniflora	4	29	2011	4	2	sand	10
S. alterniflora	4	29	2011	4	2	sand	4
S. alterniflora	4	29	2011	4	2	sand	7
S. alterniflora	4	29	2011	4	2	sand	2
S. alterniflora	4	29	2011	4	2	sand	10
S. alterniflora	4	29	2011	4	2	sand	5
S. alterniflora	4	29	2011	4	2	sand	3
S. alterniflora	4	29	2011	4	2	sand	2
S. alterniflora	4	29	2011	4	3	mud	6
S. alterniflora	4	29	2011	4	3	mud	4
S. alterniflora	4	29	2011	4	3	mud	10
S. alterniflora	4	29	2011	4	3	mud	6
S. alterniflora	4	29	2011	4	3	mud	3
S. alterniflora	4	29	2011	4	3	mud	6
S. alterniflora	4	29	2011	4	4	mud	2
S. alterniflora	4	29	2011	4	4	mud	4
S. alterniflora	4	29	2011	4	4	mud	7
S. alterniflora	4	29	2011	4	4	mud	5
S. alterniflora	4	29	2011	4	4	mud	10
S. alterniflora	4	29	2011	4	4	mud	4
S. alterniflora	4	29	2011	4	4	mud	4
S. alterniflora	4	29	2011	4	4	mud	3
S. alterniflora	4	29	2011	4	4	mud	5
S. alterniflora	4	29	2011	4	4	mud	6
S. alterniflora	4	29	2011	4	4	mud	7
S. alterniflora	4	29	2011	4	5	mud	5
S. alterniflora	4	29	2011	4	5	mud	7
S. alterniflora	4	29	2011	4	5	mud	4
S. alterniflora	4	29	2011	4	5	mud	5
S. alterniflora	4	29	2011	4	5	mud	2
S. alterniflora	4	29	2011	4	6	sand	6
S. alterniflora	4	29	2011	4	6	sand	4
S. alterniflora	4	29	2011	4	6	sand	5
S. alterniflora	4	29	2011	4	6	sand	4
S. alterniflora	4	29	2011	5	1	sand	3
S. alterniflora	4	29	2011	5	1	sand	7
S. alterniflora	4	29	2011	5	1	sand	6
S. alterniflora	4	29	2011	5	1	sand	5
S. alterniflora	4	29	2011	5	1	sand	8
S. alterniflora	4	29	2011	5	1	sand	6
S. alterniflora	4	29	2011	5	1	sand	5
S. alterniflora	4	29	2011	5	2	mud	11
S. alterniflora	4	29	2011	5	2	mud	10
S. alterniflora	4	29	2011	5	2	mud	6
S. alterniflora	4	29	2011	5	3	sand	5
S. alterniflora	4	29	2011	5	3	sand	5
S. alterniflora	4	29	2011	5	3	sand	6
S. alterniflora	4	29	2011	5	3	sand	3
S. alterniflora	4	29	2011	5	3	sand	5
S. alterniflora	4	29	2011	5	3	sand	2
S. alterniflora	4	29	2011	5	3	sand	4
S. alterniflora	4	29	2011	5	4	mud	3
S. alterniflora	4	29	2011	5	4	mud	4
S. alterniflora	4	29	2011	5	4	mud	4
S. alterniflora	4	29	2011	5	4	mud	2
S. alterniflora	4	29	2011	5	5	mud	4
S. alterniflora	4	29	2011	5	5	mud	4
S. alterniflora	4	29	2011	5	5	mud	6
S. alterniflora	4	29	2011	5	5	mud	3
S. alterniflora	4	29	2011	5	5	mud	7
S. alterniflora	4	29	2011	5	5	mud	6
S. alterniflora	4	29	2011	5	6	sand	6
S. alterniflora	4	29	2011	5	6	sand	4
S. alterniflora	4	29	2011	5	6	sand	7
S. alterniflora	4	29	2011	5	6	sand	7
S. alterniflora	4	29	2011	5	6	sand	3
S. alterniflora	4	29	2011	5	6	sand	3
S. alterniflora	4	29	2011	6	1	sand	7
S. alterniflora	4	29	2011	6	1	sand	4
S. alterniflora	4	29	2011	6	1	sand	4
S. alterniflora	4	29	2011	6	2	mud	7
S. alterniflora	4	29	2011	6	2	mud	3
S. alterniflora	4	29	2011	6	2	mud	6
S. alterniflora	4	29	2011	6	2	mud	6
S. alterniflora	4	29	2011	6	2	mud	5
S. alterniflora	4	29	2011	6	2	mud	5
S. alterniflora	4	29	2011	6	2	mud	6
S. alterniflora	4	29	2011	6	3	sand	4
S. alterniflora	4	29	2011	6	3	sand	3
S. alterniflora	4	29	2011	6	3	sand	2
S. alterniflora	4	29	2011	6	3	sand	1
S. alterniflora	4	29	2011	6	4	mud	5
S. alterniflora	4	29	2011	6	4	mud	7
S. alterniflora	4	29	2011	6	4	mud	5
S. alterniflora	4	29	2011	6	4	mud	6
S. alterniflora	4	29	2011	6	4	mud	4
S. alterniflora	4	29	2011	6	4	mud	6
S. alterniflora	4	29	2011	6	4	mud	5
S. alterniflora	4	29	2011	6	4	mud	5
S. alterniflora	4	29	2011	6	4	mud	8
S. alterniflora	4	29	2011	6	5	mud	7
S. alterniflora	4	29	2011	6	5	mud	4
S. alterniflora	4	29	2011	6	5	mud	5
S. alterniflora	4	29	2011	6	5	mud	4
S. alterniflora	4	29	2011	6	6	sand	6
S. alterniflora	4	29	2011	6	6	sand	5
S. alterniflora	4	29	2011	6	6	sand	4
S. alterniflora	5	31	2011	2	1	mud	13
S. alterniflora	5	31	2011	2	1	mud	12
S. alterniflora	5	31	2011	2	1	mud	4
S. alterniflora	5	31	2011	2	1	mud	16
S. alterniflora	5	31	2011	2	1	mud	10
S. alterniflora	5	31	2011	2	1	mud	14
S. alterniflora	5	31	2011	2	1	mud	14
S. alterniflora	5	31	2011	2	1	mud	7
S. alterniflora	5	31	2011	2	1	mud	12
S. alterniflora	5	31	2011	2	2	mud	10
S. alterniflora	5	31	2011	2	2	mud	11
S. alterniflora	5	31	2011	2	2	mud	14
S. alterniflora	5	31	2011	2	2	mud	20
S. alterniflora	5	31	2011	2	2	mud	24
S. alterniflora	5	31	2011	2	3	sand	17
S. alterniflora	5	31	2011	2	3	sand	12
S. alterniflora	5	31	2011	2	3	sand	15
S. alterniflora	5	31	2011	2	3	sand	19
S. alterniflora	5	31	2011	2	3	sand	4
S. alterniflora	5	31	2011	2	4	sand	11	patens
S. alterniflora	5	31	2011	2	4	sand	6	patens
S. alterniflora	5	31	2011	2	4	sand	8	patens
S. alterniflora	5	31	2011	2	4	sand	6	patens
S. alterniflora	5	31	2011	2	4	sand	3	patens
S. alterniflora	5	31	2011	2	5	mud	0
S. alterniflora	5	31	2011	2	6	sand	15
S. alterniflora	5	31	2011	2	6	sand	3
S. alterniflora	5	31	2011	2	6	sand	11
S. alterniflora	5	31	2011	2	6	sand	13
S. alterniflora	5	31	2011	2	6	sand	13
S. alterniflora	5	31	2011	2	6	sand	12
S. alterniflora	5	31	2011	3	1	sand	11
S. alterniflora	5	31	2011	3	1	sand	14
S. alterniflora	5	31	2011	3	1	sand	8
S. alterniflora	5	31	2011	3	1	sand	7
S. alterniflora	5	31	2011	3	2	mud	10
S. alterniflora	5	31	2011	3	2	mud	17
S. alterniflora	5	31	2011	3	2	mud	15
S. alterniflora	5	31	2011	3	2	mud	11
S. alterniflora	5	31	2011	3	2	mud	18
S. alterniflora	5	31	2011	3	2	mud	4
S. alterniflora	5	31	2011	3	2	mud	5
S. alterniflora	5	31	2011	3	2	mud	17
S. alterniflora	5	31	2011	3	2	mud	18
S. alterniflora	5	31	2011	3	3	mud	13
S. alterniflora	5	31	2011	3	3	mud	9
S. alterniflora	5	31	2011	3	3	mud	8
S. alterniflora	5	31	2011	3	3	mud	16
S. alterniflora	5	31	2011	3	3	mud	15
S. alterniflora	5	31	2011	3	3	mud	5
S. alterniflora	5	31	2011	3	3	mud	13
S. alterniflora	5	31	2011	3	4	sand	13
S. alterniflora	5	31	2011	3	4	sand	8
S. alterniflora	5	31	2011	3	4	sand	15
S. alterniflora	5	31	2011	3	4	sand	4
S. alterniflora	5	31	2011	3	4	sand	12
S. alterniflora	5	31	2011	3	5	mud	10
S. alterniflora	5	31	2011	3	5	mud	17
S. alterniflora	5	31	2011	3	5	mud	15
S. alterniflora	5	31	2011	3	5	mud	19
S. alterniflora	5	31	2011	3	5	mud	15
S. alterniflora	5	31	2011	3	6	sand	14
S. alterniflora	5	31	2011	3	6	sand	12
S. alterniflora	5	31	2011	4	1	sand	19
S. alterniflora	5	31	2011	4	1	sand	11
S. alterniflora	5	31	2011	4	1	sand	7
S. alterniflora	5	31	2011	4	1	sand	13
S. alterniflora	5	31	2011	4	1	sand	10
S. alterniflora	5	31	2011	4	1	sand	14
S. alterniflora	5	31	2011	4	1	sand	14
S. alterniflora	5	31	2011	4	1	sand	9
S. alterniflora	5	31	2011	4	2	sand	7
S. alterniflora	5	31	2011	4	2	sand	4
S. alterniflora	5	31	2011	4	2	sand	13
S. alterniflora	5	31	2011	4	2	sand	5
S. alterniflora	5	31	2011	4	2	sand	7
S. alterniflora	5	31	2011	4	2	sand	20
S. alterniflora	5	31	2011	4	2	sand	12
S. alterniflora	5	31	2011	4	2	sand	11
S. alterniflora	5	31	2011	4	2	sand	21
S. alterniflora	5	31	2011	4	2	sand	8
S. alterniflora	5	31	2011	4	3	mud	16
S. alterniflora	5	31	2011	4	3	mud	6
S. alterniflora	5	31	2011	4	3	mud	8
S. alterniflora	5	31	2011	4	3	mud	19
S. alterniflora	5	31	2011	4	3	mud	15
S. alterniflora	5	31	2011	4	3	mud	10
S. alterniflora	5	31	2011	4	4	mud	19
S. alterniflora	5	31	2011	4	4	mud	19
S. alterniflora	5	31	2011	4	4	mud	15
S. alterniflora	5	31	2011	4	4	mud	7
S. alterniflora	5	31	2011	4	4	mud	25
S. alterniflora	5	31	2011	4	4	mud	14
S. alterniflora	5	31	2011	4	4	mud	15
S. alterniflora	5	31	2011	4	4	mud	12
S. alterniflora	5	31	2011	4	4	mud	11
S. alterniflora	5	31	2011	4	4	mud	17
S. alterniflora	5	31	2011	4	4	mud	5
S. alterniflora	5	31	2011	4	4	mud	18
S. alterniflora	5	31	2011	4	4	mud	11
S. alterniflora	5	31	2011	4	4	mud	8
S. alterniflora	5	31	2011	4	4	mud	18
S. alterniflora	5	31	2011	4	4	mud	22
S. alterniflora	5	31	2011	4	5	mud	21
S. alterniflora	5	31	2011	4	5	mud	18
S. alterniflora	5	31	2011	4	5	mud	16
S. alterniflora	5	31	2011	4	5	mud	6
S. alterniflora	5	31	2011	4	5	mud	10
S. alterniflora	5	31	2011	4	5	mud	16
S. alterniflora	5	31	2011	4	6	sand	12
S. alterniflora	5	31	2011	4	6	sand	10
S. alterniflora	5	31	2011	4	6	sand	13
S. alterniflora	5	31	2011	4	6	sand	9
S. alterniflora	5	31	2011	4	6	sand	14
S. alterniflora	5	31	2011	4	6	sand	12
S. alterniflora	5	31	2011	4	6	sand	10
S. alterniflora	5	31	2011	4	6	sand	11
S. alterniflora	5	31	2011	5	1	sand	14
S. alterniflora	5	31	2011	5	1	sand	15
S. alterniflora	5	31	2011	5	1	sand	10
S. alterniflora	5	31	2011	5	1	sand	9
S. alterniflora	5	31	2011	5	1	sand	11
S. alterniflora	5	31	2011	5	1	sand	8
S. alterniflora	5	31	2011	5	1	sand	12
S. alterniflora	5	31	2011	5	1	sand	14
S. alterniflora	5	31	2011	5	1	sand	8
S. alterniflora	5	31	2011	5	2	mud	23
S. alterniflora	5	31	2011	5	2	mud	22
S. alterniflora	5	31	2011	5	2	mud	16
S. alterniflora	5	31	2011	5	3	sand	21
S. alterniflora	5	31	2011	5	3	sand	10
S. alterniflora	5	31	2011	5	3	sand	16
S. alterniflora	5	31	2011	5	3	sand	13
S. alterniflora	5	31	2011	5	3	sand	6
S. alterniflora	5	31	2011	5	3	sand	16
S. alterniflora	5	31	2011	5	3	sand	10
S. alterniflora	5	31	2011	5	3	sand	14
S. alterniflora	5	31	2011	5	4	mud	17
S. alterniflora	5	31	2011	5	4	mud	14
S. alterniflora	5	31	2011	5	4	mud	14
S. alterniflora	5	31	2011	5	4	mud	8
S. alterniflora	5	31	2011	5	5	mud	16
S. alterniflora	5	31	2011	5	5	mud	11
S. alterniflora	5	31	2011	5	5	mud	16
S. alterniflora	5	31	2011	5	5	mud	12
S. alterniflora	5	31	2011	5	6	sand	14
S. alterniflora	5	31	2011	5	6	sand	13
S. alterniflora	5	31	2011	5	6	sand	3
S. alterniflora	5	31	2011	5	6	sand	14
S. alterniflora	5	31	2011	5	6	sand	16
S. alterniflora	5	31	2011	5	6	sand	6
S. alterniflora	5	31	2011	6	1	sand	13
S. alterniflora	5	31	2011	6	1	sand	17
S. alterniflora	5	31	2011	6	1	sand	8
S. alterniflora	5	31	2011	6	1	sand	6
S. alterniflora	5	31	2011	6	2	mud	5
S. alterniflora	5	31	2011	6	2	mud	4
S. alterniflora	5	31	2011	6	2	mud	8
S. alterniflora	5	31	2011	6	2	mud	9
S. alterniflora	5	31	2011	6	2	mud	12
S. alterniflora	5	31	2011	6	2	mud	3
S. alterniflora	5	31	2011	6	2	mud	10
S. alterniflora	5	31	2011	6	2	mud	8
S. alterniflora	5	31	2011	6	3	sand	7
S. alterniflora	5	31	2011	6	3	sand	14
S. alterniflora	5	31	2011	6	3	sand	14
S. alterniflora	5	31	2011	6	3	sand	5
S. alterniflora	5	31	2011	6	4	mud	16
S. alterniflora	5	31	2011	6	4	mud	9
S. alterniflora	5	31	2011	6	4	mud	8
S. alterniflora	5	31	2011	6	4	mud	5
S. alterniflora	5	31	2011	6	4	mud	10
S. alterniflora	5	31	2011	6	4	mud	14
S. alterniflora	5	31	2011	6	4	mud	12
S. alterniflora	5	31	2011	6	4	mud	5
S. alterniflora	5	31	2011	6	4	mud	12
S. alterniflora	5	31	2011	6	5	mud	6
S. alterniflora	5	31	2011	6	5	mud	9
S. alterniflora	5	31	2011	6	5	mud	6
S. alterniflora	5	31	2011	6	5	mud	5
S. alterniflora	5	31	2011	6	5	mud	12
S. alterniflora	5	31	2011	6	6	sand	12
S. alterniflora	5	31	2011	6	6	sand	11
S. alterniflora	5	31	2011	6	6	sand	9
S. alterniflora	5	31	2011	6	6	sand	11
S. alterniflora	5	31	2011	6	6	sand	4
S. alterniflora	7	6	2011	2	1	mud	22
S. alterniflora	7	6	2011	2	1	mud	34
S. alterniflora	7	6	2011	2	1	mud	6
S. alterniflora	7	6	2011	2	1	mud	5
S. alterniflora	7	6	2011	2	1	mud	31
S. alterniflora	7	6	2011	2	1	mud	21
S. alterniflora	7	6	2011	2	1	mud	28
S. alterniflora	7	6	2011	2	1	mud	27
S. alterniflora	7	6	2011	2	1	mud	13
S. alterniflora	7	6	2011	2	1	mud	12
S. alterniflora	7	6	2011	2	2	mud	18
S. alterniflora	7	6	2011	2	2	mud	8
S. alterniflora	7	6	2011	2	2	mud	37
S. alterniflora	7	6	2011	2	2	mud	21
S. alterniflora	7	6	2011	2	2	mud	21
S. alterniflora	7	6	2011	2	3	sand	32
S. alterniflora	7	6	2011	2	3	sand	34
S. alterniflora	7	6	2011	2	3	sand	5
S. alterniflora	7	6	2011	2	3	sand	6
S. alterniflora	7	6	2011	2	3	sand	26
S. alterniflora	7	6	2011	2	4	sand	6	patens
S. alterniflora	7	6	2011	2	4	sand	17	patens
S. alterniflora	7	6	2011	2	4	sand	20	patens
S. alterniflora	7	6	2011	2	4	sand	23	patens
S. alterniflora	7	6	2011	2	4	sand	12	patens
S. alterniflora	7	6	2011	2	4	sand	19	patens
S. alterniflora	7	6	2011	2	5	mud	8
S. alterniflora	7	6	2011	2	5	mud	41
S. alterniflora	7	6	2011	2	5	mud	3
S. alterniflora	7	6	2011	2	6	sand	11
S. alterniflora	7	6	2011	2	6	sand	24
S. alterniflora	7	6	2011	2	6	sand	28
S. alterniflora	7	6	2011	2	6	sand	2
S. alterniflora	7	6	2011	2	6	sand	4
S. alterniflora	7	6	2011	2	6	sand	32
S. alterniflora	7	6	2011	2	6	sand	6
S. alterniflora	7	6	2011	3	1	sand	17
S. alterniflora	7	6	2011	3	1	sand	30
S. alterniflora	7	6	2011	3	1	sand	14
S. alterniflora	7	6	2011	3	1	sand	20
S. alterniflora	7	6	2011	3	2	mud	29
S. alterniflora	7	6	2011	3	2	mud	6
S. alterniflora	7	6	2011	3	2	mud	23
S. alterniflora	7	6	2011	3	2	mud	27
S. alterniflora	7	6	2011	3	2	mud	14
S. alterniflora	7	6	2011	3	2	mud	16
S. alterniflora	7	6	2011	3	2	mud	2
S. alterniflora	7	6	2011	3	2	mud	5
S. alterniflora	7	6	2011	3	2	mud	7
S. alterniflora	7	6	2011	3	2	mud	5
S. alterniflora	7	6	2011	3	2	mud	29
S. alterniflora	7	6	2011	3	2	mud	31
S. alterniflora	7	6	2011	3	3	mud	7
S. alterniflora	7	6	2011	3	3	mud	30
S. alterniflora	7	6	2011	3	3	mud	23
S. alterniflora	7	6	2011	3	3	mud	28
S. alterniflora	7	6	2011	3	3	mud	4
S. alterniflora	7	6	2011	3	3	mud	25
S. alterniflora	7	6	2011	3	3	mud	32
S. alterniflora	7	6	2011	3	3	mud	3
S. alterniflora	7	6	2011	3	4	sand	23
S. alterniflora	7	6	2011	3	4	sand	18
S. alterniflora	7	6	2011	3	4	sand	18
S. alterniflora	7	6	2011	3	4	sand	4
S. alterniflora	7	6	2011	3	4	sand	20
S. alterniflora	7	6	2011	3	4	sand	29
S. alterniflora	7	6	2011	3	5	mud	13
S. alterniflora	7	6	2011	3	5	mud	6
S. alterniflora	7	6	2011	3	5	mud	32
S. alterniflora	7	6	2011	3	5	mud	26
S. alterniflora	7	6	2011	3	5	mud	36
S. alterniflora	7	6	2011	3	5	mud	2
S. alterniflora	7	6	2011	3	5	mud	27
S. alterniflora	7	6	2011	3	6	sand	23
S. alterniflora	7	6	2011	3	6	sand	31
S. alterniflora	7	6	2011	3	6	sand	26
S. alterniflora	7	6	2011	3	6	sand	12
S. alterniflora	7	6	2011	3	6	sand	6
S. alterniflora	7	6	2011	4	1	sand	15
S. alterniflora	7	6	2011	4	1	sand	7
S. alterniflora	7	6	2011	4	1	sand	23
S. alterniflora	7	6	2011	4	1	sand	21
S. alterniflora	7	6	2011	4	1	sand	27
S. alterniflora	7	6	2011	4	1	sand	14
S. alterniflora	7	6	2011	4	1	sand	21
S. alterniflora	7	6	2011	4	1	sand	22
S. alterniflora	7	6	2011	4	1	sand	29
S. alterniflora	7	6	2011	4	2	sand	21
S. alterniflora	7	6	2011	4	2	sand	27
S. alterniflora	7	6	2011	4	2	sand	14
S. alterniflora	7	6	2011	4	2	sand	31
S. alterniflora	7	6	2011	4	3	mud	10
S. alterniflora	7	6	2011	4	3	mud	27
S. alterniflora	7	6	2011	4	3	mud	21
S. alterniflora	7	6	2011	4	3	mud	4
S. alterniflora	7	6	2011	4	3	mud	9
S. alterniflora	7	6	2011	4	3	mud	24
S. alterniflora	7	6	2011	4	3	mud	9
S. alterniflora	7	6	2011	4	4	mud	31
S. alterniflora	7	6	2011	4	4	mud	25
S. alterniflora	7	6	2011	4	4	mud	27
S. alterniflora	7	6	2011	4	4	mud	10
S. alterniflora	7	6	2011	4	4	mud	11
S. alterniflora	7	6	2011	4	4	mud	24
S. alterniflora	7	6	2011	4	4	mud	18
S. alterniflora	7	6	2011	4	4	mud	32
S. alterniflora	7	6	2011	4	4	mud	22
S. alterniflora	7	6	2011	4	4	mud	47
S. alterniflora	7	6	2011	4	4	mud	30
S. alterniflora	7	6	2011	4	4	mud	22
S. alterniflora	7	6	2011	4	4	mud	31
S. alterniflora	7	6	2011	4	5	mud	44
S. alterniflora	7	6	2011	4	5	mud	34
S. alterniflora	7	6	2011	4	5	mud	6
S. alterniflora	7	6	2011	4	5	mud	30
S. alterniflora	7	6	2011	4	5	mud	20
S. alterniflora	7	6	2011	4	5	mud	10
S. alterniflora	7	6	2011	4	5	mud	36
S. alterniflora	7	6	2011	4	6	sand	21
S. alterniflora	7	6	2011	4	6	sand	19
S. alterniflora	7	6	2011	4	6	sand	26
S. alterniflora	7	6	2011	4	6	sand	14
S. alterniflora	7	6	2011	4	6	sand	17
S. alterniflora	7	6	2011	4	6	sand	16
S. alterniflora	7	6	2011	4	6	sand	20
S. alterniflora	7	6	2011	4	6	sand	20
S. alterniflora	7	6	2011	5	1	sand	17
S. alterniflora	7	6	2011	5	1	sand	9
S. alterniflora	7	6	2011	5	1	sand	3
S. alterniflora	7	6	2011	5	1	sand	15
S. alterniflora	7	6	2011	5	1	sand	18
S. alterniflora	7	6	2011	5	1	sand	22
S. alterniflora	7	6	2011	5	1	sand	18
S. alterniflora	7	6	2011	5	1	sand	16
S. alterniflora	7	6	2011	5	1	sand	13
S. alterniflora	7	6	2011	5	1	sand	26
S. alterniflora	7	6	2011	5	1	sand	20
S. alterniflora	7	6	2011	5	2	mud	11
S. alterniflora	7	6	2011	5	2	mud	33
S. alterniflora	7	6	2011	5	2	mud	24
S. alterniflora	7	6	2011	5	2	mud	37
S. alterniflora	7	6	2011	5	2	mud	5
S. alterniflora	7	6	2011	5	2	mud	9
S. alterniflora	7	6	2011	5	3	sand	19
S. alterniflora	7	6	2011	5	3	sand	30
S. alterniflora	7	6	2011	5	3	sand	8
S. alterniflora	7	6	2011	5	3	sand	25
S. alterniflora	7	6	2011	5	3	sand	17
S. alterniflora	7	6	2011	5	3	sand	16
S. alterniflora	7	6	2011	5	3	sand	25
S. alterniflora	7	6	2011	5	3	sand	14
S. alterniflora	7	6	2011	5	3	sand	19
S. alterniflora	7	6	2011	5	4	mud	26
S. alterniflora	7	6	2011	5	4	mud	32
S. alterniflora	7	6	2011	5	4	mud	28
S. alterniflora	7	6	2011	5	4	mud	27
S. alterniflora	7	6	2011	5	4	mud	12
S. alterniflora	7	6	2011	5	5	mud	20
S. alterniflora	7	6	2011	5	5	mud	4
S. alterniflora	7	6	2011	5	5	mud	30
S. alterniflora	7	6	2011	5	5	mud	23
S. alterniflora	7	6	2011	5	5	mud	17
S. alterniflora	7	6	2011	5	5	mud	28
S. alterniflora	7	6	2011	5	6	sand	21
S. alterniflora	7	6	2011	5	6	sand	22
S. alterniflora	7	6	2011	5	6	sand	24
S. alterniflora	7	6	2011	5	6	sand	14
S. alterniflora	7	6	2011	5	6	sand	25
S. alterniflora	7	6	2011	6	1	sand	7
S. alterniflora	7	6	2011	6	1	sand	16
S. alterniflora	7	6	2011	6	1	sand	18
S. alterniflora	7	6	2011	6	1	sand	27
S. alterniflora	7	6	2011	6	1	sand	15
S. alterniflora	7	6	2011	6	1	sand	15
S. alterniflora	7	6	2011	6	1	sand	17
S. alterniflora	7	6	2011	6	2	mud	13
S. alterniflora	7	6	2011	6	2	mud	6
S. alterniflora	7	6	2011	6	2	mud	17
S. alterniflora	7	6	2011	6	2	mud	23
S. alterniflora	7	6	2011	6	2	mud	10
S. alterniflora	7	6	2011	6	2	mud	17
S. alterniflora	7	6	2011	6	2	mud	5
S. alterniflora	7	6	2011	6	2	mud	6
S. alterniflora	7	6	2011	6	2	mud	14
S. alterniflora	7	6	2011	6	2	mud	10
S. alterniflora	7	6	2011	6	2	mud	14
S. alterniflora	7	6	2011	6	2	mud	11
S. alterniflora	7	6	2011	6	2	mud	11
S. alterniflora	7	6	2011	6	3	sand	20
S. alterniflora	7	6	2011	6	3	sand	13
S. alterniflora	7	6	2011	6	3	sand	18
S. alterniflora	7	6	2011	6	3	sand	19
S. alterniflora	7	6	2011	6	4	mud	17
S. alterniflora	7	6	2011	6	4	mud	17
S. alterniflora	7	6	2011	6	4	mud	13
S. alterniflora	7	6	2011	6	4	mud	26
S. alterniflora	7	6	2011	6	4	mud	16
S. alterniflora	7	6	2011	6	4	mud	17
S. alterniflora	7	6	2011	6	4	mud	15
S. alterniflora	7	6	2011	6	4	mud	26
S. alterniflora	7	6	2011	6	4	mud	21
S. alterniflora	7	6	2011	6	4	mud	19
S. alterniflora	7	6	2011	6	4	mud	18
S. alterniflora	7	6	2011	6	4	mud	4
S. alterniflora	7	6	2011	6	5	mud	15
S. alterniflora	7	6	2011	6	5	mud	4
S. alterniflora	7	6	2011	6	5	mud	10
S. alterniflora	7	6	2011	6	5	mud	18
S. alterniflora	7	6	2011	6	5	mud	16
S. alterniflora	7	6	2011	6	5	mud	7
S. alterniflora	7	6	2011	6	5	mud	11
S. alterniflora	7	6	2011	6	5	mud	19
S. alterniflora	7	6	2011	6	5	mud	8
S. alterniflora	7	6	2011	6	6	sand	12
S. alterniflora	7	6	2011	6	6	sand	8
S. alterniflora	7	6	2011	6	6	sand	14
S. alterniflora	7	6	2011	6	6	sand	14
S. alterniflora	7	6	2011	6	6	sand	13
S. alterniflora	8	10	2011	2	1	mud	12
S. alterniflora	8	10	2011	2	1	mud	15
S. alterniflora	8	10	2011	2	1	mud	40	flowering
S. alterniflora	8	10	2011	2	1	mud	36
S. alterniflora	8	10	2011	2	1	mud	39	flowering
S. alterniflora	8	10	2011	2	1	mud	40	flowering
S. alterniflora	8	10	2011	2	1	mud	11
S. alterniflora	8	10	2011	2	1	mud	6
S. alterniflora	8	10	2011	2	1	mud	5
S. alterniflora	8	10	2011	2	1	mud	8
S. alterniflora	8	10	2011	2	1	mud	29
S. alterniflora	8	10	2011	2	1	mud	51	flowering
S. alterniflora	8	10	2011	2	2	mud	31
S. alterniflora	8	10	2011	2	2	mud	6
S. alterniflora	8	10	2011	2	2	mud	7
S. alterniflora	8	10	2011	2	2	mud	22
S. alterniflora	8	10	2011	2	2	mud	25
S. alterniflora	8	10	2011	2	2	mud	57	flowering
S. alterniflora	8	10	2011	2	2	mud	5
S. alterniflora	8	10	2011	2	2	mud	2
S. alterniflora	8	10	2011	2	2	mud	25
S. alterniflora	8	10	2011	2	3	sand	10
S. alterniflora	8	10	2011	2	3	sand	26
S. alterniflora	8	10	2011	2	3	sand	39	flowering
S. alterniflora	8	10	2011	2	3	sand	23
S. alterniflora	8	10	2011	2	3	sand	9
S. alterniflora	8	10	2011	2	3	sand	13
S. alterniflora	8	10	2011	2	3	sand	45	flowering
S. alterniflora	8	10	2011	2	3	sand	5
S. alterniflora	8	10	2011	2	3	sand	11
S. alterniflora	8	10	2011	2	4	sand	16	patens
S. alterniflora	8	10	2011	2	4	sand	17	patens
S. alterniflora	8	10	2011	2	4	sand	16	patens
S. alterniflora	8	10	2011	2	4	sand	15	patens
S. alterniflora	8	10	2011	2	4	sand	23	patens
S. alterniflora	8	10	2011	2	4	sand	28	patens
S. alterniflora	8	10	2011	2	4	sand	26	patens
S. alterniflora	8	10	2011	2	4	sand	22	patens
S. alterniflora	8	10	2011	2	4	sand	33	patens
S. alterniflora	8	10	2011	2	5	mud	12
S. alterniflora	8	10	2011	2	5	mud	18
S. alterniflora	8	10	2011	2	5	mud	55	flowering
S. alterniflora	8	10	2011	2	5	mud	3
S. alterniflora	8	10	2011	2	5	mud	5
S. alterniflora	8	10	2011	2	5	mud	31
S. alterniflora	8	10	2011	2	6	sand	39
S. alterniflora	8	10	2011	2	6	sand	12
S. alterniflora	8	10	2011	2	6	sand	5
S. alterniflora	8	10	2011	2	6	sand	9
S. alterniflora	8	10	2011	2	6	sand	36
S. alterniflora	8	10	2011	2	6	sand	16
S. alterniflora	8	10	2011	2	6	sand	48	flowering
S. alterniflora	8	10	2011	2	6	sand	4
S. alterniflora	8	10	2011	2	6	sand	10
S. alterniflora	8	10	2011	2	6	sand	22
S. alterniflora	8	10	2011	2	6	sand	7
S. alterniflora	8	10	2011	3	1	sand	30
S. alterniflora	8	10	2011	3	1	sand	14
S. alterniflora	8	10	2011	3	1	sand	45
S. alterniflora	8	10	2011	3	1	sand	7
S. alterniflora	8	10	2011	3	1	sand	28	flowering
S. alterniflora	8	10	2011	3	1	sand	34	flowering
S. alterniflora	8	10	2011	3	2	mud	44
S. alterniflora	8	10	2011	3	2	mud	13
S. alterniflora	8	10	2011	3	2	mud	5
S. alterniflora	8	10	2011	3	2	mud	12
S. alterniflora	8	10	2011	3	2	mud	12	flowering
S. alterniflora	8	10	2011	3	2	mud	31
S. alterniflora	8	10	2011	3	2	mud	32
S. alterniflora	8	10	2011	3	2	mud	12
S. alterniflora	8	10	2011	3	2	mud	26
S. alterniflora	8	10	2011	3	2	mud	18
S. alterniflora	8	10	2011	3	2	mud	46
S. alterniflora	8	10	2011	3	2	mud	8
S. alterniflora	8	10	2011	3	3	mud	16
S. alterniflora	8	10	2011	3	3	mud	34
S. alterniflora	8	10	2011	3	3	mud	6	flowering
S. alterniflora	8	10	2011	3	3	mud	48
S. alterniflora	8	10	2011	3	3	mud	34
S. alterniflora	8	10	2011	3	3	mud	6
S. alterniflora	8	10	2011	3	3	mud	6
S. alterniflora	8	10	2011	3	3	mud	43	flowering
S. alterniflora	8	10	2011	3	3	mud	7
S. alterniflora	8	10	2011	3	3	mud	53
S. alterniflora	8	10	2011	3	3	mud	2
S. alterniflora	8	10	2011	3	3	mud	1
S. alterniflora	8	10	2011	3	3	mud	17
S. alterniflora	8	10	2011	3	4	sand	32	flowering
S. alterniflora	8	10	2011	3	4	sand	28
S. alterniflora	8	10	2011	3	4	sand	26
S. alterniflora	8	10	2011	3	4	sand	16
S. alterniflora	8	10	2011	3	4	sand	9
S. alterniflora	8	10	2011	3	4	sand	39
S. alterniflora	8	10	2011	3	4	sand	7
S. alterniflora	8	10	2011	3	5	mud	13
S. alterniflora	8	10	2011	3	5	mud	41
S. alterniflora	8	10	2011	3	5	mud	3
S. alterniflora	8	10	2011	3	5	mud	4
S. alterniflora	8	10	2011	3	5	mud	44
S. alterniflora	8	10	2011	3	5	mud	5
S. alterniflora	8	10	2011	3	5	mud	19
S. alterniflora	8	10	2011	3	5	mud	34	flowering
S. alterniflora	8	10	2011	3	5	mud	47
S. alterniflora	8	10	2011	3	6	sand	13
S. alterniflora	8	10	2011	3	6	sand	8
S. alterniflora	8	10	2011	3	6	sand	34	flowering
S. alterniflora	8	10	2011	3	6	sand	2
S. alterniflora	8	10	2011	3	6	sand	52
S. alterniflora	8	10	2011	3	6	sand	42
S. alterniflora	8	10	2011	4	1	sand	8
S. alterniflora	8	10	2011	4	1	sand	5
S. alterniflora	8	10	2011	4	1	sand	35	flowering
S. alterniflora	8	10	2011	4	1	sand	34	flowering
S. alterniflora	8	10	2011	4	1	sand	18
S. alterniflora	8	10	2011	4	1	sand	21
S. alterniflora	8	10	2011	4	1	sand	39	flowering
S. alterniflora	8	10	2011	4	1	sand	9
S. alterniflora	8	10	2011	4	1	sand	29	flowering
S. alterniflora	8	10	2011	4	1	sand	36	flowering
S. alterniflora	8	10	2011	4	1	sand	38
S. alterniflora	8	10	2011	4	2	sand	7
S. alterniflora	8	10	2011	4	2	sand	2
S. alterniflora	8	10	2011	4	2	sand	29
S. alterniflora	8	10	2011	4	2	sand	6
S. alterniflora	8	10	2011	4	2	sand	28
S. alterniflora	8	10	2011	4	2	sand	43
S. alterniflora	8	10	2011	4	2	sand	8
S. alterniflora	8	10	2011	4	2	sand	47	flowering
S. alterniflora	8	10	2011	4	2	sand	26
S. alterniflora	8	10	2011	4	2	sand	5
S. alterniflora	8	10	2011	4	3	mud	22
S. alterniflora	8	10	2011	4	3	mud	22
S. alterniflora	8	10	2011	4	3	mud	18
S. alterniflora	8	10	2011	4	3	mud	25
S. alterniflora	8	10	2011	4	3	mud	27
S. alterniflora	8	10	2011	4	3	mud	6
S. alterniflora	8	10	2011	4	3	mud	19
S. alterniflora	8	10	2011	4	3	mud	36
S. alterniflora	8	10	2011	4	3	mud	14
S. alterniflora	8	10	2011	4	3	mud	10
S. alterniflora	8	10	2011	4	3	mud	10
S. alterniflora	8	10	2011	4	3	mud	10
S. alterniflora	8	10	2011	4	3	mud	23
S. alterniflora	8	10	2011	4	3	mud	3
S. alterniflora	8	10	2011	4	3	mud	6
S. alterniflora	8	10	2011	4	4	mud	2
S. alterniflora	8	10	2011	4	4	mud	5
S. alterniflora	8	10	2011	4	4	mud	3
S. alterniflora	8	10	2011	4	4	mud	56	flowering
S. alterniflora	8	10	2011	4	4	mud	31
S. alterniflora	8	10	2011	4	4	mud	41
S. alterniflora	8	10	2011	4	4	mud	22
S. alterniflora	8	10	2011	4	4	mud	9
S. alterniflora	8	10	2011	4	4	mud	30
S. alterniflora	8	10	2011	4	4	mud	23
S. alterniflora	8	10	2011	4	4	mud	26
S. alterniflora	8	10	2011	4	4	mud	37	flowering
S. alterniflora	8	10	2011	4	4	mud	45
S. alterniflora	8	10	2011	4	4	mud	5
S. alterniflora	8	10	2011	4	4	mud	39	flowering
S. alterniflora	8	10	2011	4	4	mud	41
S. alterniflora	8	10	2011	4	4	mud	30
S. alterniflora	8	10	2011	4	4	mud	7
S. alterniflora	8	10	2011	4	5	mud	55	flowering
S. alterniflora	8	10	2011	4	5	mud	12
S. alterniflora	8	10	2011	4	5	mud	55	flowering
S. alterniflora	8	10	2011	4	5	mud	32
S. alterniflora	8	10	2011	4	5	mud	1
S. alterniflora	8	10	2011	4	5	mud	1
S. alterniflora	8	10	2011	4	5	mud	4
S. alterniflora	8	10	2011	4	5	mud	31
S. alterniflora	8	10	2011	4	5	mud	3
S. alterniflora	8	10	2011	4	5	mud	18
S. alterniflora	8	10	2011	4	5	mud	16
S. alterniflora	8	10	2011	4	5	mud	51	flowering
S. alterniflora	8	10	2011	4	5	mud	4
S. alterniflora	8	10	2011	4	5	mud	3
S. alterniflora	8	10	2011	4	5	mud	9
S. alterniflora	8	10	2011	4	6	sand	29	flowering
S. alterniflora	8	10	2011	4	6	sand	23
S. alterniflora	8	10	2011	4	6	sand	23
S. alterniflora	8	10	2011	4	6	sand	29
S. alterniflora	8	10	2011	4	6	sand	31	flowering
S. alterniflora	8	10	2011	4	6	sand	46
S. alterniflora	8	10	2011	4	6	sand	24
S. alterniflora	8	10	2011	4	6	sand	23
S. alterniflora	8	10	2011	4	6	sand	7
S. alterniflora	8	10	2011	5	1	sand	12
S. alterniflora	8	10	2011	5	1	sand	23
S. alterniflora	8	10	2011	5	1	sand	18
S. alterniflora	8	10	2011	5	1	sand	21	flowering
S. alterniflora	8	10	2011	5	1	sand	21
S. alterniflora	8	10	2011	5	1	sand	17
S. alterniflora	8	10	2011	5	1	sand	18
S. alterniflora	8	10	2011	5	1	sand	12	flowering
S. alterniflora	8	10	2011	5	1	sand	20
S. alterniflora	8	10	2011	5	1	sand	40
S. alterniflora	8	10	2011	5	1	sand	11
S. alterniflora	8	10	2011	5	1	sand	10
S. alterniflora	8	10	2011	5	1	sand	20
S. alterniflora	8	10	2011	5	2	mud	21
S. alterniflora	8	10	2011	5	2	mud	4
S. alterniflora	8	10	2011	5	2	mud	11
S. alterniflora	8	10	2011	5	2	mud	58
S. alterniflora	8	10	2011	5	2	mud	26	flowering
S. alterniflora	8	10	2011	5	2	mud	39
S. alterniflora	8	10	2011	5	2	mud	3
S. alterniflora	8	10	2011	5	2	mud	4
S. alterniflora	8	10	2011	5	2	mud	4
S. alterniflora	8	10	2011	5	2	mud	23
S. alterniflora	8	10	2011	5	3	sand	11
S. alterniflora	8	10	2011	5	3	sand	11	flowering
S. alterniflora	8	10	2011	5	3	sand	6	flowering
S. alterniflora	8	10	2011	5	3	sand	16
S. alterniflora	8	10	2011	5	3	sand	23	flowering
S. alterniflora	8	10	2011	5	3	sand	10
S. alterniflora	8	10	2011	5	3	sand	26
S. alterniflora	8	10	2011	5	3	sand	13
S. alterniflora	8	10	2011	5	3	sand	12
S. alterniflora	8	10	2011	5	3	sand	21
S. alterniflora	8	10	2011	5	3	sand	12
S. alterniflora	8	10	2011	5	3	sand	30
S. alterniflora	8	10	2011	5	3	sand	27
S. alterniflora	8	10	2011	5	3	sand	19
S. alterniflora	8	10	2011	5	3	sand	6
S. alterniflora	8	10	2011	5	3	sand	24
S. alterniflora	8	10	2011	5	3	sand	29
S. alterniflora	8	10	2011	5	3	sand	44
S. alterniflora	8	10	2011	5	4	mud	20
S. alterniflora	8	10	2011	5	4	mud	39
S. alterniflora	8	10	2011	5	4	mud	38
S. alterniflora	8	10	2011	5	4	mud	9
S. alterniflora	8	10	2011	5	4	mud	49
S. alterniflora	8	10	2011	5	4	mud	9
S. alterniflora	8	10	2011	5	4	mud	42
S. alterniflora	8	10	2011	5	4	mud	16
S. alterniflora	8	10	2011	5	4	mud	7
S. alterniflora	8	10	2011	5	4	mud	6	flowering
S. alterniflora	8	10	2011	5	5	mud	24
S. alterniflora	8	10	2011	5	5	mud	3
S. alterniflora	8	10	2011	5	5	mud	3
S. alterniflora	8	10	2011	5	5	mud	11	flowering
S. alterniflora	8	10	2011	5	5	mud	7
S. alterniflora	8	10	2011	5	5	mud	34	flowering
S. alterniflora	8	10	2011	5	5	mud	44
S. alterniflora	8	10	2011	5	5	mud	26
S. alterniflora	8	10	2011	5	5	mud	28
S. alterniflora	8	10	2011	5	5	mud	8
S. alterniflora	8	10	2011	5	5	mud	4
S. alterniflora	8	10	2011	5	5	mud	4
S. alterniflora	8	10	2011	5	6	sand	3
S. alterniflora	8	10	2011	5	6	sand	3
S. alterniflora	8	10	2011	5	6	sand	27
S. alterniflora	8	10	2011	5	6	sand	31
S. alterniflora	8	10	2011	5	6	sand	3
S. alterniflora	8	10	2011	5	6	sand	9
S. alterniflora	8	10	2011	5	6	sand	36
S. alterniflora	8	10	2011	5	6	sand	37
S. alterniflora	8	10	2011	5	6	sand	40
S. alterniflora	8	10	2011	5	6	sand	11
S. alterniflora	8	10	2011	5	6	sand	5
S. alterniflora	8	10	2011	6	1	sand	14
S. alterniflora	8	10	2011	6	1	sand	8
S. alterniflora	8	10	2011	6	1	sand	16
S. alterniflora	8	10	2011	6	1	sand	18
S. alterniflora	8	10	2011	6	1	sand	18
S. alterniflora	8	10	2011	6	1	sand	37
S. alterniflora	8	10	2011	6	1	sand	9
S. alterniflora	8	10	2011	6	1	sand	5
S. alterniflora	8	10	2011	6	1	sand	21
S. alterniflora	8	10	2011	6	1	sand	11
S. alterniflora	8	10	2011	6	1	sand	13
S. alterniflora	8	10	2011	6	2	mud	10
S. alterniflora	8	10	2011	6	2	mud	22
S. alterniflora	8	10	2011	6	2	mud	11
S. alterniflora	8	10	2011	6	2	mud	21	flowering
S. alterniflora	8	10	2011	6	2	mud	12
S. alterniflora	8	10	2011	6	2	mud	18
S. alterniflora	8	10	2011	6	2	mud	25
S. alterniflora	8	10	2011	6	2	mud	13
S. alterniflora	8	10	2011	6	2	mud	10
S. alterniflora	8	10	2011	6	2	mud	35	flowering
S. alterniflora	8	10	2011	6	2	mud	15
S. alterniflora	8	10	2011	6	2	mud	22
S. alterniflora	8	10	2011	6	3	sand	7
S. alterniflora	8	10	2011	6	3	sand	9
S. alterniflora	8	10	2011	6	3	sand	23
S. alterniflora	8	10	2011	6	3	sand	8
S. alterniflora	8	10	2011	6	3	sand	27
S. alterniflora	8	10	2011	6	3	sand	26
S. alterniflora	8	10	2011	6	4	mud	7
S. alterniflora	8	10	2011	6	4	mud	20
S. alterniflora	8	10	2011	6	4	mud	19
S. alterniflora	8	10	2011	6	4	mud	5
S. alterniflora	8	10	2011	6	4	mud	34	flowering
S. alterniflora	8	10	2011	6	4	mud	16
S. alterniflora	8	10	2011	6	4	mud	15
S. alterniflora	8	10	2011	6	4	mud	18
S. alterniflora	8	10	2011	6	4	mud	13
S. alterniflora	8	10	2011	6	4	mud	34	flowering
S. alterniflora	8	10	2011	6	4	mud	24
S. alterniflora	8	10	2011	6	4	mud	22
S. alterniflora	8	10	2011	6	4	mud	19
S. alterniflora	8	10	2011	6	5	mud	6
S. alterniflora	8	10	2011	6	5	mud	32	flowering
S. alterniflora	8	10	2011	6	5	mud	10
S. alterniflora	8	10	2011	6	5	mud	28	flowering
S. alterniflora	8	10	2011	6	5	mud	9
S. alterniflora	8	10	2011	6	5	mud	24	flowering
S. alterniflora	8	10	2011	6	5	mud	6
S. alterniflora	8	10	2011	6	5	mud	28	flowering
S. alterniflora	8	10	2011	6	5	mud	8
S. alterniflora	8	10	2011	6	5	mud	11
S. alterniflora	8	10	2011	6	5	mud	17
S. alterniflora	8	10	2011	6	6	sand	9
S. alterniflora	8	10	2011	6	6	sand	15
S. alterniflora	8	10	2011	6	6	sand	4
S. alterniflora	8	10	2011	6	6	sand	4
S. alterniflora	8	10	2011	6	6	sand	19
S. alterniflora	8	10	2011	6	6	sand	22
S. alterniflora	8	10	2011	6	6	sand	17
S. alterniflora	8	10	2011	6	6	sand	11
S. alterniflora	8	10	2011	6	6	sand	12
S. alterniflora	8	10	2011	6	6	sand	13
S. alterniflora	9	12	2011	2	1	mud	22
S. alterniflora	9	12	2011	2	1	mud	38
S. alterniflora	9	12	2011	2	1	mud	40
S. alterniflora	9	12	2011	2	1	mud	16
S. alterniflora	9	12	2011	2	1	mud	41
S. alterniflora	9	12	2011	2	1	mud	41
S. alterniflora	9	12	2011	2	1	mud	8
S. alterniflora	9	12	2011	2	1	mud	8
S. alterniflora	9	12	2011	2	1	mud	5
S. alterniflora	9	12	2011	2	1	mud	11
S. alterniflora	9	12	2011	2	1	mud	28
S. alterniflora	9	12	2011	2	1	mud	7
S. alterniflora	9	12	2011	2	1	mud	5
S. alterniflora	9	12	2011	2	2	mud	7
S. alterniflora	9	12	2011	2	2	mud	33
S. alterniflora	9	12	2011	2	2	mud	11
S. alterniflora	9	12	2011	2	2	mud	23
S. alterniflora	9	12	2011	2	2	mud	24
S. alterniflora	9	12	2011	2	2	mud	5
S. alterniflora	9	12	2011	2	2	mud	67
S. alterniflora	9	12	2011	2	2	mud	7
S. alterniflora	9	12	2011	2	2	mud	37
S. alterniflora	9	12	2011	2	2	mud	10
S. alterniflora	9	12	2011	2	2	mud	4
S. alterniflora	9	12	2011	2	3	sand	16
S. alterniflora	9	12	2011	2	3	sand	27
S. alterniflora	9	12	2011	2	3	sand	39
S. alterniflora	9	12	2011	2	3	sand	6
S. alterniflora	9	12	2011	2	3	sand	28
S. alterniflora	9	12	2011	2	3	sand	13
S. alterniflora	9	12	2011	2	3	sand	24
S. alterniflora	9	12	2011	2	3	sand	11
S. alterniflora	9	12	2011	2	3	sand	21
S. alterniflora	9	12	2011	2	3	sand	54
S. alterniflora	9	12	2011	2	4	sand	0	all dead patens
S. alterniflora	9	12	2011	2	5	mud	6
S. alterniflora	9	12	2011	2	5	mud	21
S. alterniflora	9	12	2011	2	5	mud	5
S. alterniflora	9	12	2011	2	5	mud	7
S. alterniflora	9	12	2011	2	5	mud	11
S. alterniflora	9	12	2011	2	5	mud	42
S. alterniflora	9	12	2011	2	5	mud	7
S. alterniflora	9	12	2011	2	5	mud	59
S. alterniflora	9	12	2011	2	6	sand	13
S. alterniflora	9	12	2011	2	6	sand	49
S. alterniflora	9	12	2011	2	6	sand	22
S. alterniflora	9	12	2011	2	6	sand	14
S. alterniflora	9	12	2011	2	6	sand	32
S. alterniflora	9	12	2011	2	6	sand	39
S. alterniflora	9	12	2011	2	6	sand	14
S. alterniflora	9	12	2011	2	6	sand	8
S. alterniflora	9	12	2011	2	6	sand	16
S. alterniflora	9	12	2011	2	6	sand	11
S. alterniflora	9	12	2011	3	1	sand	20
S. alterniflora	9	12	2011	3	1	sand	35
S. alterniflora	9	12	2011	3	1	sand	33
S. alterniflora	9	12	2011	3	1	sand	51
S. alterniflora	9	12	2011	3	1	sand	27
S. alterniflora	9	12	2011	3	1	sand	4
S. alterniflora	9	12	2011	3	1	sand	10
S. alterniflora	9	12	2011	3	1	sand	5
S. alterniflora	9	12	2011	3	1	sand	3
S. alterniflora	9	12	2011	3	2	mud	46
S. alterniflora	9	12	2011	3	2	mud	5
S. alterniflora	9	12	2011	3	2	mud	32
S. alterniflora	9	12	2011	3	2	mud	3
S. alterniflora	9	12	2011	3	2	mud	15
S. alterniflora	9	12	2011	3	2	mud	13
S. alterniflora	9	12	2011	3	2	mud	16
S. alterniflora	9	12	2011	3	2	mud	34
S. alterniflora	9	12	2011	3	2	mud	29
S. alterniflora	9	12	2011	3	2	mud	21
S. alterniflora	9	12	2011	3	2	mud	61
S. alterniflora	9	12	2011	3	2	mud	5
S. alterniflora	9	12	2011	3	2	mud	12
S. alterniflora	9	12	2011	3	3	mud	43
S. alterniflora	9	12	2011	3	3	mud	6
S. alterniflora	9	12	2011	3	3	mud	21
S. alterniflora	9	12	2011	3	3	mud	36
S. alterniflora	9	12	2011	3	3	mud	66
S. alterniflora	9	12	2011	3	3	mud	7
S. alterniflora	9	12	2011	3	3	mud	9
S. alterniflora	9	12	2011	3	3	mud	58
S. alterniflora	9	12	2011	3	3	mud	13
S. alterniflora	9	12	2011	3	3	mud	5
S. alterniflora	9	12	2011	3	3	mud	42
S. alterniflora	9	12	2011	3	3	mud	34
S. alterniflora	9	12	2011	3	4	sand	6
S. alterniflora	9	12	2011	3	4	sand	19
S. alterniflora	9	12	2011	3	4	sand	49
S. alterniflora	9	12	2011	3	4	sand	14
S. alterniflora	9	12	2011	3	4	sand	35
S. alterniflora	9	12	2011	3	4	sand	31
S. alterniflora	9	12	2011	3	4	sand	38
S. alterniflora	9	12	2011	3	4	sand	10
S. alterniflora	9	12	2011	3	5	mud	6
S. alterniflora	9	12	2011	3	5	mud	18
S. alterniflora	9	12	2011	3	5	mud	42
S. alterniflora	9	12	2011	3	5	mud	4
S. alterniflora	9	12	2011	3	5	mud	3
S. alterniflora	9	12	2011	3	5	mud	48
S. alterniflora	9	12	2011	3	5	mud	25
S. alterniflora	9	12	2011	3	5	mud	32
S. alterniflora	9	12	2011	3	5	mud	4
S. alterniflora	9	12	2011	3	5	mud	4
S. alterniflora	9	12	2011	3	5	mud	14
S. alterniflora	9	12	2011	3	6	sand	21
S. alterniflora	9	12	2011	3	6	sand	13
S. alterniflora	9	12	2011	3	6	sand	62
S. alterniflora	9	12	2011	3	6	sand	45
S. alterniflora	9	12	2011	4	1	sand	13
S. alterniflora	9	12	2011	4	1	sand	7
S. alterniflora	9	12	2011	4	1	sand	51
S. alterniflora	9	12	2011	4	1	sand	35
S. alterniflora	9	12	2011	4	1	sand	45
S. alterniflora	9	12	2011	4	1	sand	24
S. alterniflora	9	12	2011	4	1	sand	8
S. alterniflora	9	12	2011	4	1	sand	35
S. alterniflora	9	12	2011	4	1	sand	44
S. alterniflora	9	12	2011	4	1	sand	47
S. alterniflora	9	12	2011	4	2	sand	12
S. alterniflora	9	12	2011	4	2	sand	4
S. alterniflora	9	12	2011	4	2	sand	31
S. alterniflora	9	12	2011	4	2	sand	11
S. alterniflora	9	12	2011	4	2	sand	32
S. alterniflora	9	12	2011	4	2	sand	45
S. alterniflora	9	12	2011	4	2	sand	9
S. alterniflora	9	12	2011	4	2	sand	9
S. alterniflora	9	12	2011	4	2	sand	46
S. alterniflora	9	12	2011	4	2	sand	29
S. alterniflora	9	12	2011	4	2	sand	10
S. alterniflora	9	12	2011	4	3	mud	11
S. alterniflora	9	12	2011	4	3	mud	2
S. alterniflora	9	12	2011	4	3	mud	7
S. alterniflora	9	12	2011	4	3	mud	5
S. alterniflora	9	12	2011	4	3	mud	5
S. alterniflora	9	12	2011	4	3	mud	3
S. alterniflora	9	12	2011	4	3	mud	32
S. alterniflora	9	12	2011	4	3	mud	37
S. alterniflora	9	12	2011	4	3	mud	11
S. alterniflora	9	12	2011	4	3	mud	4
S. alterniflora	9	12	2011	4	3	mud	22
S. alterniflora	9	12	2011	4	3	mud	21
S. alterniflora	9	12	2011	4	3	mud	36
S. alterniflora	9	12	2011	4	3	mud	13
S. alterniflora	9	12	2011	4	3	mud	29
S. alterniflora	9	12	2011	4	3	mud	14
S. alterniflora	9	12	2011	4	3	mud	13
S. alterniflora	9	12	2011	4	3	mud	23
S. alterniflora	9	12	2011	4	3	mud	4
S. alterniflora	9	12	2011	4	3	mud	15
S. alterniflora	9	12	2011	4	3	mud	26
S. alterniflora	9	12	2011	4	3	mud	8
S. alterniflora	9	12	2011	4	4	mud	7
S. alterniflora	9	12	2011	4	4	mud	8
S. alterniflora	9	12	2011	4	4	mud	7
S. alterniflora	9	12	2011	4	4	mud	6
S. alterniflora	9	12	2011	4	4	mud	8
S. alterniflora	9	12	2011	4	4	mud	5
S. alterniflora	9	12	2011	4	4	mud	36
S. alterniflora	9	12	2011	4	4	mud	72
S. alterniflora	9	12	2011	4	4	mud	39
S. alterniflora	9	12	2011	4	4	mud	42
S. alterniflora	9	12	2011	4	4	mud	32
S. alterniflora	9	12	2011	4	4	mud	5
S. alterniflora	9	12	2011	4	4	mud	4
S. alterniflora	9	12	2011	4	4	mud	40
S. alterniflora	9	12	2011	4	4	mud	27
S. alterniflora	9	12	2011	4	4	mud	25
S. alterniflora	9	12	2011	4	4	mud	34
S. alterniflora	9	12	2011	4	4	mud	26
S. alterniflora	9	12	2011	4	4	mud	45
S. alterniflora	9	12	2011	4	4	mud	48
S. alterniflora	9	12	2011	4	5	mud	14
S. alterniflora	9	12	2011	4	5	mud	51
S. alterniflora	9	12	2011	4	5	mud	19
S. alterniflora	9	12	2011	4	5	mud	54
S. alterniflora	9	12	2011	4	5	mud	39
S. alterniflora	9	12	2011	4	5	mud	11
S. alterniflora	9	12	2011	4	5	mud	7
S. alterniflora	9	12	2011	4	5	mud	31
S. alterniflora	9	12	2011	4	5	mud	16
S. alterniflora	9	12	2011	4	5	mud	15
S. alterniflora	9	12	2011	4	5	mud	2
S. alterniflora	9	12	2011	4	5	mud	4
S. alterniflora	9	12	2011	4	5	mud	4
S. alterniflora	9	12	2011	4	5	mud	55
S. alterniflora	9	12	2011	4	6	sand	9
S. alterniflora	9	12	2011	4	6	sand	2
S. alterniflora	9	12	2011	4	6	sand	3
S. alterniflora	9	12	2011	4	6	sand	32
S. alterniflora	9	12	2011	4	6	sand	29
S. alterniflora	9	12	2011	4	6	sand	24
S. alterniflora	9	12	2011	4	6	sand	48
S. alterniflora	9	12	2011	4	6	sand	28
S. alterniflora	9	12	2011	4	6	sand	8
S. alterniflora	9	12	2011	4	6	sand	8
S. alterniflora	9	12	2011	5	1	sand	11
S. alterniflora	9	12	2011	5	1	sand	19
S. alterniflora	9	12	2011	5	1	sand	31
S. alterniflora	9	12	2011	5	1	sand	19
S. alterniflora	9	12	2011	5	1	sand	17
S. alterniflora	9	12	2011	5	1	sand	23
S. alterniflora	9	12	2011	5	1	sand	8
S. alterniflora	9	12	2011	5	1	sand	8
S. alterniflora	9	12	2011	5	1	sand	16
S. alterniflora	9	12	2011	5	1	sand	22
S. alterniflora	9	12	2011	5	1	sand	33
S. alterniflora	9	12	2011	5	1	sand	14
S. alterniflora	9	12	2011	5	1	sand	12
S. alterniflora	9	12	2011	5	1	sand	13
S. alterniflora	9	12	2011	5	1	sand	5
S. alterniflora	9	12	2011	5	1	sand	20
S. alterniflora	9	12	2011	5	2	mud	13
S. alterniflora	9	12	2011	5	2	mud	28
S. alterniflora	9	12	2011	5	2	mud	4
S. alterniflora	9	12	2011	5	2	mud	12
S. alterniflora	9	12	2011	5	2	mud	8
S. alterniflora	9	12	2011	5	2	mud	61
S. alterniflora	9	12	2011	5	2	mud	8
S. alterniflora	9	12	2011	5	2	mud	7
S. alterniflora	9	12	2011	5	2	mud	51
S. alterniflora	9	12	2011	5	2	mud	6
S. alterniflora	9	12	2011	5	2	mud	26
S. alterniflora	9	12	2011	5	2	mud	6
S. alterniflora	9	12	2011	5	2	mud	34
S. alterniflora	9	12	2011	5	2	mud	8
S. alterniflora	9	12	2011	5	3	sand	15
S. alterniflora	9	12	2011	5	3	sand	13
S. alterniflora	9	12	2011	5	3	sand	20
S. alterniflora	9	12	2011	5	3	sand	26
S. alterniflora	9	12	2011	5	3	sand	49
S. alterniflora	9	12	2011	5	3	sand	30
S. alterniflora	9	12	2011	5	3	sand	22
S. alterniflora	9	12	2011	5	3	sand	17
S. alterniflora	9	12	2011	5	3	sand	22
S. alterniflora	9	12	2011	5	3	sand	12
S. alterniflora	9	12	2011	5	3	sand	25
S. alterniflora	9	12	2011	5	3	sand	11
S. alterniflora	9	12	2011	5	3	sand	15
S. alterniflora	9	12	2011	5	3	sand	31
S. alterniflora	9	12	2011	5	3	sand	7
S. alterniflora	9	12	2011	5	3	sand	16
S. alterniflora	9	12	2011	5	3	sand	20
S. alterniflora	9	12	2011	5	3	sand	23
S. alterniflora	9	12	2011	5	3	sand	10
S. alterniflora	9	12	2011	5	3	sand	9
S. alterniflora	9	12	2011	5	4	mud	16
S. alterniflora	9	12	2011	5	4	mud	14
S. alterniflora	9	12	2011	5	4	mud	19
S. alterniflora	9	12	2011	5	4	mud	39
S. alterniflora	9	12	2011	5	4	mud	44
S. alterniflora	9	12	2011	5	4	mud	7
S. alterniflora	9	12	2011	5	4	mud	14
S. alterniflora	9	12	2011	5	4	mud	48
S. alterniflora	9	12	2011	5	4	mud	14
S. alterniflora	9	12	2011	5	4	mud	34
S. alterniflora	9	12	2011	5	4	mud	19
S. alterniflora	9	12	2011	5	5	mud	16
S. alterniflora	9	12	2011	5	5	mud	2
S. alterniflora	9	12	2011	5	5	mud	10
S. alterniflora	9	12	2011	5	5	mud	5
S. alterniflora	9	12	2011	5	5	mud	18
S. alterniflora	9	12	2011	5	5	mud	6
S. alterniflora	9	12	2011	5	5	mud	6
S. alterniflora	9	12	2011	5	5	mud	12
S. alterniflora	9	12	2011	5	5	mud	36
S. alterniflora	9	12	2011	5	5	mud	46
S. alterniflora	9	12	2011	5	5	mud	22
S. alterniflora	9	12	2011	5	5	mud	32
S. alterniflora	9	12	2011	5	5	mud	7
S. alterniflora	9	12	2011	5	6	sand	5
S. alterniflora	9	12	2011	5	6	sand	26
S. alterniflora	9	12	2011	5	6	sand	43
S. alterniflora	9	12	2011	5	6	sand	4
S. alterniflora	9	12	2011	5	6	sand	35
S. alterniflora	9	12	2011	5	6	sand	5
S. alterniflora	9	12	2011	5	6	sand	15
S. alterniflora	9	12	2011	5	6	sand	44
S. alterniflora	9	12	2011	5	6	sand	50
S. alterniflora	9	12	2011	5	6	sand	10
S. alterniflora	9	12	2011	5	6	sand	8
S. alterniflora	9	12	2011	6	1	sand	21
S. alterniflora	9	12	2011	6	1	sand	25
S. alterniflora	9	12	2011	6	1	sand	18
S. alterniflora	9	12	2011	6	1	sand	21
S. alterniflora	9	12	2011	6	1	sand	12
S. alterniflora	9	12	2011	6	1	sand	18
S. alterniflora	9	12	2011	6	1	sand	42
S. alterniflora	9	12	2011	6	1	sand	13
S. alterniflora	9	12	2011	6	1	sand	21
S. alterniflora	9	12	2011	6	1	sand	10
S. alterniflora	9	12	2011	6	1	sand	21
S. alterniflora	9	12	2011	6	1	sand	4
S. alterniflora	9	12	2011	6	2	mud	21
S. alterniflora	9	12	2011	6	2	mud	13
S. alterniflora	9	12	2011	6	2	mud	33
S. alterniflora	9	12	2011	6	2	mud	14
S. alterniflora	9	12	2011	6	2	mud	7
S. alterniflora	9	12	2011	6	2	mud	41
S. alterniflora	9	12	2011	6	2	mud	11
S. alterniflora	9	12	2011	6	2	mud	19
S. alterniflora	9	12	2011	6	2	mud	26
S. alterniflora	9	12	2011	6	2	mud	12
S. alterniflora	9	12	2011	6	2	mud	12
S. alterniflora	9	12	2011	6	2	mud	9
S. alterniflora	9	12	2011	6	2	mud	9
S. alterniflora	9	12	2011	6	2	mud	24
S. alterniflora	9	12	2011	6	3	sand	15
S. alterniflora	9	12	2011	6	3	sand	23
S. alterniflora	9	12	2011	6	3	sand	28
S. alterniflora	9	12	2011	6	3	sand	25
S. alterniflora	9	12	2011	6	3	sand	16
S. alterniflora	9	12	2011	6	3	sand	13
S. alterniflora	9	12	2011	6	3	sand	12
S. alterniflora	9	12	2011	6	4	mud	8
S. alterniflora	9	12	2011	6	4	mud	6
S. alterniflora	9	12	2011	6	4	mud	19
S. alterniflora	9	12	2011	6	4	mud	45
S. alterniflora	9	12	2011	6	4	mud	15
S. alterniflora	9	12	2011	6	4	mud	15
S. alterniflora	9	12	2011	6	4	mud	13
S. alterniflora	9	12	2011	6	4	mud	37
S. alterniflora	9	12	2011	6	4	mud	30
S. alterniflora	9	12	2011	6	4	mud	6
S. alterniflora	9	12	2011	6	4	mud	23
S. alterniflora	9	12	2011	6	4	mud	11
S. alterniflora	9	12	2011	6	4	mud	21
S. alterniflora	9	12	2011	6	5	mud	6
S. alterniflora	9	12	2011	6	5	mud	4
S. alterniflora	9	12	2011	6	5	mud	5
S. alterniflora	9	12	2011	6	5	mud	12
S. alterniflora	9	12	2011	6	5	mud	25
S. alterniflora	9	12	2011	6	5	mud	4
S. alterniflora	9	12	2011	6	5	mud	6
S. alterniflora	9	12	2011	6	5	mud	17
S. alterniflora	9	12	2011	6	5	mud	26
S. alterniflora	9	12	2011	6	5	mud	18
S. alterniflora	9	12	2011	6	5	mud	13
S. alterniflora	9	12	2011	6	5	mud	31
S. alterniflora	9	12	2011	6	5	mud	34
S. alterniflora	9	12	2011	6	5	mud	11
S. alterniflora	9	12	2011	6	5	mud	29
S. alterniflora	9	12	2011	6	5	mud	7
S. alterniflora	9	12	2011	6	6	sand	5
S. alterniflora	9	12	2011	6	6	sand	7
S. alterniflora	9	12	2011	6	6	sand	11
S. alterniflora	9	12	2011	6	6	sand	28
S. alterniflora	9	12	2011	6	6	sand	22
S. alterniflora	9	12	2011	6	6	sand	8
S. alterniflora	9	12	2011	6	6	sand	9
S. alterniflora	9	12	2011	6	6	sand	25
S. alterniflora	9	12	2011	6	6	sand	19
S. alterniflora	9	12	2011	6	6	sand	24
S. alterniflora	9	12	2011	6	6	sand	17
S. alterniflora	9	12	2011	6	6	sand	21
S. alterniflora	9	12	2011	6	6	sand	14

## Sheet: plant biomass&density
plant biomass and density (per pot) determined from height measurements (Morris & Haskin, Ecol, 1990)
used SAS to compile data
level 2, pot 4 was all patens---have height and density, but no biomass estimates----indicated with '.'
0' means no live plants
mm	dd	yyyy	id	level	rep	treatment	mNAVD88	gdw/pot	#plants/pot	avg plant ht/pot	stderr plant ht
4	29	2011	2.1	2	1	mud	0.82	0.075	8	4.5	0.46291
4	29	2011	2.2	2	2	mud	0.82	0.06	5	5.2	0.734847
4	29	2011	2.3	2	3	sand	0.82	0.035	4	3.5	0.645497
4	29	2011	2.4	2	4	sand	0.82	.	2	6.5	2.5
4	29	2011	2.5	2	5	mud	0.82	0.04	3	6.66667	1.20185
4	29	2011	2.6	2	6	sand	0.82	0.09	6	5.66667	0.614636
4	29	2011	3.1	3	1	sand	0.99	0.05	4	4.75	0.853913
4	29	2011	3.2	3	2	mud	0.99	0.11	6	7.83333	0.477261
4	29	2011	3.3	3	3	mud	0.99	0.05	4	5.25	0.629153
4	29	2011	3.4	3	4	sand	0.99	0.045	5	4.2	0.734847
4	29	2011	3.5	3	5	mud	0.99	0.075	7	5.14286	0.704698
4	29	2011	3.6	3	6	sand	0.99	0.07	5	5.4	1.16619
4	29	2011	4.1	4	1	sand	1.15	0.06	6	4.33333	0.333333
4	29	2011	4.2	4	2	sand	1.15	0.12	8	5.375	1.16401
4	29	2011	4.3	4	3	mud	1.15	0.08	6	5.83333	0.980363
4	29	2011	4.4	4	4	mud	1.15	0.145	11	5.18182	0.671744
4	29	2011	4.5	4	5	mud	1.15	0.055	5	4.6	0.812404
4	29	2011	4.6	4	6	sand	1.15	0.04	4	4.75	0.478714
4	29	2011	5.1	5	1	sand	1.32	0.09	7	5.71429	0.606092
4	29	2011	5.2	5	2	mud	1.32	0.07	3	9	1.52753
4	29	2011	5.3	5	3	sand	1.32	0.065	7	4.28571	0.521641
4	29	2011	5.4	5	4	mud	1.32	0.035	4	3.25	0.478714
4	29	2011	5.5	5	5	mud	1.32	0.07	6	5	0.632456
4	29	2011	5.6	5	6	sand	1.32	0.08	6	5	0.774597
4	29	2011	6.1	6	1	sand	1.49	0.04	3	5	1
4	29	2011	6.2	6	2	mud	1.49	0.08	7	5.42857	0.480929
4	29	2011	6.3	6	3	sand	1.49	0.03	4	2.5	0.645497
4	29	2011	6.4	6	4	mud	1.49	0.11	9	5.66667	0.408248
4	29	2011	6.5	6	5	mud	1.49	0.05	4	5	0.707107
4	29	2011	6.6	6	6	sand	1.49	0.03	3	5	0.57735
5	31	2011	2.1	2	1	mud	0.82	0.35	9	11.3333	1.25831
5	31	2011	2.2	2	2	mud	0.82	0.4	5	15.8	2.69072
5	31	2011	2.3	2	3	sand	0.82	0.29	5	13.4	2.61916
5	31	2011	2.4	2	4	sand	0.82	.	5	6.8	1.31909
5	31	2011	2.5	2	5	mud	0.82	0	0	0
5	31	2011	2.6	2	6	sand	0.82	0.22	6	11.1667	1.72079
5	31	2011	3.1	3	1	sand	0.99	0.12	4	10	1.58114
5	31	2011	3.2	3	2	mud	0.99	0.48	9	12.7778	1.83922
5	31	2011	3.3	3	3	mud	0.99	0.26	7	11.2857	1.52307
5	31	2011	3.4	3	4	sand	0.99	0.17	5	10.4	1.96469
5	31	2011	3.5	3	5	mud	0.99	0.33	5	15.2	1.49666
5	31	2011	3.6	3	6	sand	0.99	0.09	2	13	1
5	31	2011	4.1	4	1	sand	1.15	0.34	8	12.125	1.31526
5	31	2011	4.2	4	2	sand	1.15	0.43	10	10.8	1.8607
5	31	2011	4.3	4	3	mud	1.15	0.29	6	12.3333	2.07632
5	31	2011	4.4	4	4	mud	1.15	1.12	16	14.75	1.37992
5	31	2011	4.5	4	5	mud	1.15	0.4	6	14.5	2.24722
5	31	2011	4.6	4	6	sand	1.15	0.28	8	11.375	0.595744
5	31	2011	5.1	5	1	sand	1.32	0.32	9	11.2222	0.894082
5	31	2011	5.2	5	2	mud	1.32	0.37	3	20.3333	2.18581
5	31	2011	5.3	5	3	sand	1.32	0.43	8	13.25	1.6339
5	31	2011	5.4	5	4	mud	1.32	0.2	4	13.25	1.88746
5	31	2011	5.5	5	5	mud	1.32	0.21	4	13.75	1.31498
5	31	2011	5.6	5	6	sand	1.32	0.23	6	11	2.12916
5	31	2011	6.1	6	1	sand	1.49	0.15	4	11	2.48328
5	31	2011	6.2	6	2	mud	1.49	0.16	8	7.375	1.10093
5	31	2011	6.3	6	3	sand	1.49	0.13	4	10	2.34521
5	31	2011	6.4	6	4	mud	1.49	0.29	9	10.1111	1.2632
5	31	2011	6.5	6	5	mud	1.49	0.09	5	7.6	1.28841
5	31	2011	6.6	6	6	sand	1.49	0.13	5	9.4	1.43527
7	6	2011	2.1	2	1	mud	0.82	1.67	10	19.9	3.28109
7	6	2011	2.2	2	2	mud	0.82	0.91	5	21	4.65833
7	6	2011	2.3	2	3	sand	0.82	1.03	5	20.6	6.30555
7	6	2011	2.4	2	4	sand	0.82	.	6	16.1667	2.52212
7	6	2011	2.5	2	5	mud	0.82	0.69	3	17.3333	11.921
7	6	2011	2.6	2	6	sand	0.82	0.87	7	15.2857	4.69404
7	6	2011	3.1	3	1	sand	0.99	0.58	4	20.25	3.47311
7	6	2011	3.2	3	2	mud	0.99	1.5	12	16.1667	3.20472
7	6	2011	3.3	3	3	mud	0.99	1.34	8	19	4.326
7	6	2011	3.4	3	4	sand	0.99	0.78	6	18.6667	3.38296
7	6	2011	3.5	3	5	mud	0.99	1.37	7	20.2857	5.00816
7	6	2011	3.6	3	6	sand	0.99	0.79	5	19.6	4.61086
7	6	2011	4.1	4	1	sand	1.15	1.27	9	19.8889	2.28184
7	6	2011	4.2	4	2	sand	1.15	0.77	4	23.25	3.70529
7	6	2011	4.3	4	3	mud	1.15	0.66	7	14.8571	3.37659
7	6	2011	4.4	4	4	mud	1.15	3.36	13	25.3846	2.68074
7	6	2011	4.5	4	5	mud	1.15	2.17	7	25.7143	5.33503
7	6	2011	4.6	4	6	sand	1.15	0.94	8	19.125	1.28782
7	6	2011	5.1	5	1	sand	1.32	1.02	11	16.0909	1.8803
7	6	2011	5.2	5	2	mud	1.32	1.16	6	19.8333	5.47976
7	6	2011	5.3	5	3	sand	1.32	1.18	9	19.2222	2.20969
7	6	2011	5.4	5	4	mud	1.32	1.13	5	25	3.40588
7	6	2011	5.5	5	5	mud	1.32	0.96	6	20.3333	3.81809
7	6	2011	5.6	5	6	sand	1.32	0.73	5	21.2	1.93391
7	6	2011	6.1	6	1	sand	1.49	0.67	7	16.4286	2.22387
7	6	2011	6.2	6	2	mud	1.49	0.71	13	12.0769	1.41177
7	6	2011	6.3	6	3	sand	1.49	0.38	4	17.5	1.55456
7	6	2011	6.4	6	4	mud	1.49	1.27	12	17.4167	1.6763
7	6	2011	6.5	6	5	mud	1.49	0.48	9	12	1.74801
7	6	2011	6.6	6	6	sand	1.49	0.24	5	12.2	1.11355
8	10	2011	2.1	2	1	mud	0.82	3.43	12	24.3333	4.74235
8	10	2011	2.2	2	2	mud	0.82	2.12	9	20	5.84285
8	10	2011	2.3	2	3	sand	0.82	1.85	9	20.1111	4.72418
8	10	2011	2.4	2	4	sand	0.82	.	9	21.7778	2.10672
8	10	2011	2.5	2	5	mud	0.82	1.57	6	20.6667	8.0111
8	10	2011	2.6	2	6	sand	0.82	2.2	11	18.9091	4.6151
8	10	2011	3.1	3	1	sand	0.99	1.74	6	26.3333	5.62534
8	10	2011	3.2	3	2	mud	0.99	2.71	12	21.5833	4.02353
8	10	2011	3.3	3	3	mud	0.99	3.41	13	21	5.21831
8	10	2011	3.4	3	4	sand	0.99	1.52	7	22.4286	4.55055
8	10	2011	3.5	3	5	mud	0.99	2.57	9	23.3333	6.08048
8	10	2011	3.6	3	6	sand	0.99	1.99	6	25.1667	8.28821
8	10	2011	4.1	4	1	sand	1.15	2.86	11	24.7273	3.92218
8	10	2011	4.2	4	2	sand	1.15	2.25	10	20.1	5.26719
8	10	2011	4.3	4	3	mud	1.15	2.01	15	16.7333	2.39934
8	10	2011	4.4	4	4	mud	1.15	5.43	18	25.1111	3.92153
8	10	2011	4.5	4	5	mud	1.15	3.98	15	19.6667	5.20592
8	10	2011	4.6	4	6	sand	1.15	2.38	9	26.1111	3.40524
8	10	2011	5.1	5	1	sand	1.32	1.95	13	18.6923	2.14053
8	10	2011	5.2	5	2	mud	1.32	2.35	10	19.3	5.75818
8	10	2011	5.3	5	3	sand	1.32	2.94	18	18.8889	2.35271
8	10	2011	5.4	5	4	mud	1.32	2.76	10	23.5	5.28152
8	10	2011	5.5	5	5	mud	1.32	1.91	12	16.3333	4.09237
8	10	2011	5.6	5	6	sand	1.32	2.13	11	18.6364	4.65983
8	10	2011	6.1	6	1	sand	1.49	1.31	11	15.4545	2.59847
8	10	2011	6.2	6	2	mud	1.49	1.65	12	17.8333	2.17713
8	10	2011	6.3	6	3	sand	1.49	0.79	6	16.6667	3.92145
8	10	2011	6.4	6	4	mud	1.49	2.01	13	18.9231	2.38441
8	10	2011	6.5	6	5	mud	1.49	1.45	11	16.2727	2.98813
8	10	2011	6.6	6	6	sand	1.49	0.81	10	12.6	1.8809
9	12	2011	2.1	2	1	mud	0.82	3.1	13	20.7692	4.13731
9	12	2011	2.2	2	2	mud	0.82	2.95	11	20.7273	5.78885
9	12	2011	2.3	2	3	sand	0.82	2.79	10	23.9	4.51774
9	12	2011	2.4	2	4	sand	0.82	.	0	0
9	12	2011	2.5	2	5	mud	0.82	2.05	8	19.75	7.12829
9	12	2011	2.6	2	6	sand	0.82	2.51	10	21.8	4.31998
9	12	2011	3.1	3	1	sand	0.99	2.21	9	20.8889	5.61111
9	12	2011	3.2	3	2	mud	0.99	3.57	13	22.4615	4.79933
9	12	2011	3.3	3	3	mud	0.99	4.51	12	28.3333	6.12537
9	12	2011	3.4	3	4	sand	0.99	2.36	8	25.25	5.38434
9	12	2011	3.5	3	5	mud	0.99	2.32	11	18.1818	4.9485
9	12	2011	3.6	3	6	sand	0.99	1.93	4	35.25	11.2129
9	12	2011	4.1	4	1	sand	1.15	3.79	10	30.9	5.30293
9	12	2011	4.2	4	2	sand	1.15	2.76	11	21.6364	4.63244
9	12	2011	4.3	4	3	mud	1.15	3.72	22	15.5	2.36474
9	12	2011	4.4	4	4	mud	1.15	6.56	20	25.8	4.26713
9	12	2011	4.5	4	5	mud	1.15	4.05	14	23	5.16859
9	12	2011	4.6	4	6	sand	1.15	2.17	10	19.1	4.83379
9	12	2011	5.1	5	1	sand	1.32	2.92	16	16.9375	1.96101
9	12	2011	5.2	5	2	mud	1.32	3.43	14	19.4286	4.85811
9	12	2011	5.3	5	3	sand	1.32	4.34	20	19.65	2.17434
9	12	2011	5.4	5	4	mud	1.32	3.12	11	24.3636	4.26673
9	12	2011	5.5	5	5	mud	1.32	2.48	13	16.7692	3.78789
9	12	2011	5.6	5	6	sand	1.32	2.95	11	22.2727	5.38025
9	12	2011	6.1	6	1	sand	1.49	2.46	12	18.8333	2.71593
9	12	2011	6.2	6	2	mud	1.49	2.76	14	17.9286	2.68177
9	12	2011	6.3	6	3	sand	1.49	1.41	7	18.8571	2.40464
9	12	2011	6.4	6	4	mud	1.49	2.8	13	19.1538	3.33176
9	12	2011	6.5	6	5	mud	1.49	2.7	16	15.5	2.61406
9	12	2011	6.6	6	6	sand	1.49	2.25	13	16.1538	2.12388

## Sheet: CT data
Plum Island Organ Experiment 2011
			Abundance in 10 cm depth						Volume in 30 cm depth
			Coarse Root			Rhizome
season	sediment	Core#	Count (average per slice)	Abundance (count m-2)	Root Diameter (mm average per slice)	Count (average per slice)	rhizome abundance/m2	Root Diameter (mm average per slice)	Total Coarse Root Volume (mm3)	Total Rhizome Volume (mm3)
Sept	natural	2.1	16.575	2153.16	1.46236	13.15	1708.24	2.99906	4896.12	17492.2
Sept	natural	2.2	12.1438	1577.52	1.40726	7.70625	1001.07	3.19488	3914.47	16874
Sept	natural	2.5	10.7312	1394.03	1.45722	10.55	1370.49	3.24668	4514.46	20376.6
Sept	natural	3.2	13.3	1727.72	1.41523	11.5875	1505.26	3.1273	5080.66	19442.6
Sept	natural	3.3	20.0938	2610.26	1.43025	16.3062	2118.24	3.03539	6008.34	22806.5
Sept	natural	3.5	14.65	1903.09	1.41575	13.1813	1712.3	3.07296	4914.62	20342.4
Sept	natural	4.3	16.7375	2174.27	1.47969	12.0437	1564.53	2.98385	5562.4	15927.6
Sept	natural	4.4	27.6375	3590.22	1.43962	21.8375	2836.78	3.13251	8227.27	29215.9
Sept	natural	4.5	19.3562	2514.45	1.42612	12.9	1675.76	2.99444	5454.74	18307.6
Sept	natural	5.2	20.7188	2691.45	1.43523	17.5562	2280.62	3.10789	7448.98	28044.8
Sept	natural	5.4	18.35	2383.74	1.44061	14.9437	1941.25	3.14635	6252.99	23878.5
Sept	natural	5.5	22.7437	2954.5	1.4381	14.1625	1839.76	3.23984	7378.72	25626.4
Sept	natural	6.2	27.8313	3615.39	1.43583	20.1	2611.07	3.0726	8351.54	26964.9
Sept	natural	6.4	26.575	3452.2	1.43585	17.7125	2300.92	3.03054	7959.95	24358.5
Sept	natural	6.5	19.7375	2563.98	1.42843	13.4625	1748.83	3.06812	6700.62	23123.9
Sept	sand	2.3	17.575	2283.06	1.44336	13.5188	1756.14	2.91998	4427.9	13315.2
Sept	sand	2.6	17.6125	2287.93	1.42145	11	1428.94	3.00636	5401.17	13181.2
Sept	sand	3.4	15.5062	2014.32	1.43984	9.55625	1241.39	2.87051	4994.62	10552.6
Sept	sand	4.2	17.4187	2262.76	1.42859	9.88125	1283.61	3.02505	5060.83	10696.5
Sept	sand	4.6	17.8	2312.29	1.40632	7.5	974.279	2.68029	3884.04	5964.54
Sept	sand	5.3	25.3625	3294.69	1.41659	12.2438	1590.51	2.97579	6431.18	13749.2
Sept	sand	5.6	21.1	2740.97	1.41757	11.1625	1450.05	2.89915	5978.63	12722.3
Sept	sand	6.1	16.6	2156.4	1.40039	9.5625	1242.21	3.07969	6293.86	16779.1
Sept	sand	6.3	19.3	2507.14	1.40928	11.9187	1548.29	3.23996	8664.5	22649.1
Sept	sand	2.4	12.5	1623.8	1.41098	8.69375	1129.35	2.88317	3387.18	8219.87
Sept	sand	3.1	18.3813	2387.8	1.40691	11.625	1510.13	3.22513	4969.9	14067.1
Sept	sand	3.6	11.6125	1508.51	1.43392	9.18125	1192.68	3.07431	3422.17	13093.3
Sept	sand	4.1	16.625	2159.65	1.41926	10.2688	1333.95	3.04277	5051.71	12046
Sept	sand	5.1	17.65	2292.8	1.4319	12.0813	1569.4	3.17981	5314.35	15491.6
Sept	sand	6.6	21.25	2760.46	1.40272	10.9688	1424.88	3.1811	7267.54	20421.5
July	natural	2.1	7.2125	936.932	1.48871	9.075	1178.88	3.18114	3834.01	14503.5
July	natural	2.2	8.9	1156.14	1.44562	6.3375	823.266	3.39494	4519.88	19210.2
July	natural	2.5	8.3125	1079.83	1.49601	10.1188	1314.46	3.24688	4685.75	18978.4
July	natural	3.2	9.725	1263.32	1.44851	9.5625	1242.21	3.26322	5190.98	19097.9
July	natural	3.3	16.0625	2086.58	1.44884	12.4437	1616.49	3.23872	6448.57	19967.5
July	natural	3.5	12.2063	1585.64	1.43381	9.44375	1226.78	3.07538	5253.62	14704
July	natural	4.3	10.25	1331.51	1.50022	9.70625	1260.88	2.97505	4897.78	14326.9
July	natural	4.4	18.675	2425.95	1.47233	16.6938	2168.58	3.12383	7341.34	23346.3
July	natural	4.5	14.2937	1856.81	1.45523	12.5563	1631.11	3.35705	5396.82	21684.3
July	natural	5.2	14.2	1844.63	1.44413	12.9437	1681.44	3.3025	6178.76	22326.7
July	natural	5.4	9.21875	1197.55	1.45262	8.9125	1157.77	3.38716	4900.64	17468.7
July	natural	5.5	12.8125	1664.39	1.44548	11.9812	1556.41	3.26932	6093	21977.6
July	natural	6.2	19.3625	2515.26	1.43108	16.8	2182.39	3.10785	6486.12	24360.4
July	natural	6.4	16.6562	2163.71	1.4509	14.1937	1843.82	3.35042	6157.48	22629.4
July	natural	6.5	13.9437	1811.35	1.44686	10.4563	1358.31	3.10874	5109.4	14279.4
July	sand	2.3	19.5125	2534.75	1.42842	11.5	1493.89	3.14718	4947.72	13329.7
July	sand	2.4	10.9625	1424.07	1.44055	7.2875	946.674	2.98088	3438.89	7164.72
July	sand	2.6	23.9812	3115.26	1.44626	14.5312	1887.67	2.99937	5653.31	12399.3
July	sand	3.1	16.9125	2197	1.43187	12.8625	1670.89	3.30065	5089.93	23666
July	sand	3.4	12	1558.85	1.45738	9.36875	1217.04	3.2392	4423.18	13040.3
July	sand	3.6	16.0188	2080.9	1.44057	9.44375	1226.78	3.02912	4852.78	11177
July	sand	4.1	17.9312	2329.34	1.42499	10.075	1308.78	3.14429	5269.87	12403.4
July	sand	4.2	20.025	2601.33	1.41348	13.0938	1700.93	3.30337	5052.82	14917.3
July	sand	4.6	18.7125	2430.83	1.42062	10.625	1380.23	2.87747	4407.48	9398.74
July	sand	5.1	19.525	2536.37	1.41973	11.2688	1463.85	3.24528	4741.67	13833.9
July	sand	5.3	16.2312	2108.5	1.41278	9.64375	1252.76	3.14947	4301.84	11727.7
July	sand	5.6	15.5062	2014.32	1.39068	7.69375	999.448	2.99046	4869.27	11427.7
July	sand	6.1	20.7688	2697.94	1.40739	11.8187	1535.3	3.1692	6638.01	15590.8
July	sand	6.3	21.8062	2832.72	1.41294	13.2937	1726.91	3.22494	7787.29	19684.4
July	sand	6.6	27.375	3556.12	1.39875	13.6562	1774	3.16234	8268.33	19836.4

## Sheet: belowground mass
M = natural, S = sand-amended
ID	mass (g)	gdw/m2	m or s
2.1	24.406	3011.97	m
2.2	20.099	2480.44	m
2.3	38.187	4712.7	s
2.4	22.31	2753.3	s
2.5	40.869	5043.69	m
2.6	13.198	1628.78	s
3.1	62.66	7732.94	s
3.2	39.438	4867.09	m
3.3	37.826	4668.15	m
3.4	60.512	7467.85	s
3.5	30.56	3771.44	m
3.6	27.788	3429.35	s
4.1	33.156	4091.82	s
4.2	33.398	4121.68	s
4.3	44.298	5466.86	m
4.4	63.554	7843.27	m
4.5	25.362	3129.95	m
4.6	41.962	5178.58	s
5.1	30.136	3719.12	s
5.2	49.322	6086.88	m
5.3	68.614	8467.73	s
5.4	36.694	4528.45	m
5.5	45.186	5576.45	m
5.6	55.69	6872.76	s
6.1	24.215	2988.4	s
6.2	46.729	5766.88	m
6.3	30.152	3721.09	s
6.4	54.652	6744.66	m
6.5	34.59	4268.79	m
6.6	38.192	4713.32	s

## Sheet: Soil respiration
M = Natural, S = sand-amended
level	pot	ID	treatment	flux (umol/m2/s)
2	1	2.1	m	1.08
2	2	2.2	m	1.69
2	3	2.3	s	4.62
2	4	2.4	s	0.66
2	5	2.5	m	1.03
2	6	2.6	s	1.51
3	1	3.1	s	2.06
3	2	3.2	m	1
3	3	3.3	m	2.22
3	4	3.4	s	1.34
3	5	3.5	m	0.69
3	6	3.6	s	1.77
4	1	4.1	s	7.45
4	2	4.2	s	5.76
4	3	4.3	m	1.53
4	4	4.4	m	3.91
4	5	4.5	m	1.52
4	6	4.6	s	1.56
5	1	5.1	s	6.61
5	2	5.2	m	3.58
5	3	5.3	s	8.49
5	4	5.4	m	1.99
5	5	5.5	m	1.73
5	6	5.6	s	4.39
6	1	6.1	s	4.44
6	2	6.2	m	3.59
6	3	6.3	s	3.19
6	4	6.4	m	3.34
6	5	6.5	m	2.46
6	6	6.6	s	5.31

## Sheet: BOS MHW
Monthly Means (W5) - 8443970 Boston, MA
Station -- Unique seven character identifier for the station
Year -- Year of data
Mo -- Month of data
Highest -- Highest Tide of the month
MHHW -- Mean Higher-High Water
MHW -- Mean High Water Click HERE for printable version
MSL -- Mean Sea Level with additional datums, tidal
MTL -- Mean of MHW and MLW ranges and Greenwich intervals
MLW -- Mean Low Water (best viewed by printing landscape)
MLLW -- Mean Lower-Low Water
NAVD -- North American Vertical Datum
Lowest -- Lowest Tide of the month
Inf -- Inferred data
Data is Meters on relative to NAVD
												annual mean	annual mean
Station	Year	Mon	Highest	MHHW	MHW	MSL	MTL	MLW	MLLW	Lowest	Inf	MHHW	MHW	MSL
8443970	1999	1	2.049	1.452	1.292	-0.17	-0.205	-1.701	-1.811	-2.564	0	1.47675	1.35967	-0.0811667
8443970	1999	2	1.84	1.499	1.381	-0.055	-0.089	-1.558	-1.634	-2.127	0
8443970	1999	3	1.914	1.457	1.367	-0.093	-0.14	-1.647	-1.716	-2.164	0
8443970	1999	4	2.014	1.478	1.399	-0.037	-0.076	-1.551	-1.631	-2.23	0
8443970	1999	5	1.934	1.462	1.347	-0.07	-0.109	-1.564	-1.674	-2.346	0
8443970	1999	6	2.034	1.454	1.317	-0.094	-0.133	-1.582	-1.703	-2.285	0
8443970	1999	7	1.95	1.51	1.375	-0.046	-0.09	-1.554	-1.649	-2.194	0
8443970	1999	8	1.878	1.51	1.402	-0.03	-0.069	-1.539	-1.622	-2.096	0
8443970	1999	9	1.92	1.515	1.41	-0.046	-0.085	-1.58	-1.666	-2.078	0
8443970	1999	10	1.951	1.464	1.367	-0.087	-0.121	-1.609	-1.711	-2.225	0
8443970	1999	11	2.019	1.445	1.328	-0.123	-0.16	-1.647	-1.761	-2.441	0
8443970	1999	12	1.981	1.475	1.331	-0.123	-0.153	-1.637	-1.775	-2.406	0
8443970	2000	1	2.242	1.472	1.322	-0.131	-0.158	-1.637	-1.753	-2.359	0	1.47725	1.35242	-0.0805833
8443970	2000	2	2.132	1.373	1.233	-0.22	-0.259	-1.75	-1.845	-2.335	0
8443970	2000	3	1.9	1.45	1.332	-0.083	-0.122	-1.576	-1.651	-2.028	0
8443970	2000	4	1.857	1.476	1.378	-0.063	-0.107	-1.591	-1.687	-2.165	0
8443970	2000	5	1.924	1.536	1.426	-0.015	-0.057	-1.539	-1.653	-2.203	0
8443970	2000	6	2.15	1.55	1.412	-0.036	-0.075	-1.562	-1.679	-2.276	0
8443970	2000	7	2.091	1.595	1.453	-0.01	-0.055	-1.562	-1.666	-2.277	0
8443970	2000	8	2.042	1.549	1.422	-0.035	-0.078	-1.578	-1.66	-2.201	0
8443970	2000	9	1.914	1.449	1.35	-0.071	-0.108	-1.565	-1.631	-2.027	0
8443970	2000	10	1.767	1.426	1.321	-0.099	-0.126	-1.573	-1.69	-1.964	0
8443970	2000	11	1.941	1.494	1.378	-0.021	-0.049	-1.476	-1.597	-2.065	0
8443970	2000	12	2.051	1.357	1.202	-0.183	-0.212	-1.626	-1.755	-2.623	0
8443970	2001	1	2.052	1.446	1.315	-0.106	-0.136	-1.586	-1.703	-2.227	0	1.46008	1.32992	-0.08525
8443970	2001	2	1.998	1.366	1.231	-0.204	-0.234	-1.698	-1.792	-2.592	0
8443970	2001	3	2.284	1.502	1.392	-0.047	-0.082	-1.555	-1.646	-2.238	0
8443970	2001	4	1.858	1.447	1.336	-0.103	-0.14	-1.616	-1.723	-2.185	0
8443970	2001	5	1.767	1.463	1.36	-0.073	-0.109	-1.577	-1.698	-2.19	0
8443970	2001	6	1.883	1.478	1.345	-0.078	-0.115	-1.574	-1.692	-2.089	0
8443970	2001	7	1.986	1.511	1.357	-0.068	-0.103	-1.562	-1.683	-2.244	0
8443970	2001	8	2.028	1.488	1.341	-0.068	-0.105	-1.551	-1.653	-2.223	0
8443970	2001	9	1.962	1.485	1.359	-0.038	-0.072	-1.502	-1.596	-2.145	0
8443970	2001	10	1.931	1.43	1.321	-0.06	-0.094	-1.508	-1.611	-2.208	0
8443970	2001	11	1.781	1.416	1.28	-0.104	-0.135	-1.549	-1.675	-2.161	0
8443970	2001	12	1.856	1.489	1.322	-0.074	-0.103	-1.527	-1.685	-2.111	0
8443970	2002	1	2.085	1.485	1.302	-0.13	-0.161	-1.623	-1.749	-2.218	0	1.46083	1.31658	-0.0850833
8443970	2002	2	2.069	1.491	1.332	-0.079	-0.115	-1.561	-1.67	-2.512	0
8443970	2002	3	1.841	1.361	1.246	-0.206	-0.249	-1.744	-1.838	-2.416	0
8443970	2002	4	2.208	1.415	1.279	-0.148	-0.189	-1.656	-1.756	-2.434	0
8443970	2002	5	1.841	1.44	1.296	-0.1	-0.139	-1.573	-1.688	-2.199	0
8443970	2002	6	1.807	1.471	1.325	-0.067	-0.099	-1.523	-1.641	-2.023	0
8443970	2002	7	1.743	1.465	1.323	-0.057	-0.092	-1.506	-1.609	-1.951	0
8443970	2002	8	1.803	1.449	1.308	-0.049	-0.082	-1.472	-1.547	-2.043	0
8443970	2002	9	1.932	1.471	1.346	-0.032	-0.062	-1.469	-1.549	-2.14	0
8443970	2002	10	1.984	1.478	1.338	-0.035	-0.063	-1.464	-1.565	-2.209	0
8443970	2002	11	2.423	1.48	1.345	-0.055	-0.09	-1.525	-1.646	-2.137	0
8443970	2002	12	1.985	1.524	1.359	-0.063	-0.088	-1.535	-1.648	-2.293	0
8443970	2003	1	2.406	1.509	1.326	-0.096	-0.129	-1.583	-1.697	-2.291	0	1.473	1.33417	-0.0640833
8443970	2003	2	1.952	1.336	1.189	-0.217	-0.239	-1.667	-1.751	-2.188	0
8443970	2003	3	1.938	1.426	1.298	-0.119	-0.158	-1.613	-1.701	-2.235	0
8443970	2003	4	1.992	1.444	1.332	-0.069	-0.108	-1.547	-1.631	-2.281	0
8443970	2003	5	1.923	1.471	1.346	-0.033	-0.068	-1.481	-1.602	-2.404	0
8443970	2003	6	2.068	1.517	1.369	0.001	-0.037	-1.442	-1.563	-2.139	0
8443970	2003	7	1.958	1.496	1.34	-0.03	-0.069	-1.478	-1.586	-2.064	0
8443970	2003	8	1.822	1.512	1.376	-0.026	-0.064	-1.504	-1.578	-1.933	0
8443970	2003	9	2.071	1.508	1.396	-0.018	-0.057	-1.509	-1.602	-2.002	0
8443970	2003	10	2.042	1.464	1.344	-0.052	-0.09	-1.523	-1.652	-2.263	0
8443970	2003	11	2.143	1.479	1.334	-0.064	-0.095	-1.523	-1.664	-2.302	0
8443970	2003	12	2.175	1.514	1.36	-0.046	-0.077	-1.514	-1.647	-2.352	0
8443970	2004	1		1.419	1.242	-0.13	-0.148	-1.538	-1.645	1		1.45875	1.31425	-0.0625833
8443970	2004	2	2.067	1.376	1.224	-0.171	-0.199	-1.622	-1.717	-2.188	0
8443970	2004	3	1.902	1.374	1.24	-0.134	-0.166	-1.571	-1.661	-2.016	0
8443970	2004	4	1.922	1.429	1.299	-0.078	-0.116	-1.53	-1.641	-2.123	0
8443970	2004	5	1.972	1.433	1.302	-0.081	-0.119	-1.54	-1.657	-2.246	0
8443970	2004	6	2.068	1.527	1.368	-0.035	-0.071	-1.509	-1.64	-2.298	0
8443970	2004	7	2.044	1.553	1.381	-0.032	-0.071	-1.522	-1.646	-2.167	0
8443970	2004	8	1.948	1.504	1.355	-0.05	-0.092	-1.539	-1.639	-2.177	0
8443970	2004	9	1.926	1.46	1.344	-0.026	-0.061	-1.466	-1.55	-1.928	0
8443970	2004	10	1.95	1.533	1.418	0.061	0.03	-1.357	-1.478	-1.873	0
8443970	2004	11	2.066	1.455	1.309	-0.026	-0.057	-1.422	-1.558	-1.987	0
8443970	2004	12	2.211	1.442	1.289	-0.049	-0.078	-1.445	-1.596	-2.205	0
8443970	2005	1	2.105	1.461	1.311	-0.053	-0.08	-1.471	-1.606	-2.301	0	1.5305	1.37867	-0.00358333
8443970	2005	2	2.324	1.508	1.352	-0.052	-0.086	-1.524	-1.621	-2.209	0
8443970	2005	3	2.24	1.548	1.41	0	-0.036	-1.482	-1.586	-2.339	0
8443970	2005	4	2.054	1.567	1.437	0.039	-0.002	-1.44	-1.55	-2.001	0
8443970	2005	5	2.522	1.634	1.501	0.097	0.063	-1.375	-1.521	-1.9	0
8443970	2005	6	2.078	1.593	1.435	0.029	-0.008	-1.451	-1.592	-2.085	0
8443970	2005	7	2.085	1.561	1.393	0.015	-0.017	-1.427	-1.547	-2.038	0
8443970	2005	8	2.054	1.512	1.346	-0.014	-0.049	-1.444	-1.556	-2.111	0
8443970	2005	9	1.987	1.467	1.32	-0.034	-0.07	-1.459	-1.562	-2.099	0
8443970	2005	10	1.973	1.511	1.387	0.041	0.007	-1.373	-1.497	-2.076	0
8443970	2005	11	1.845	1.485	1.332	-0.036	-0.072	-1.475	-1.62	-2.082	0
8443970	2005	12	2.013	1.519	1.32	-0.075	-0.11	-1.54	-1.705	-2.196	0
8443970	2006	1	2.459	1.575	1.362	-0.046	-0.082	-1.525	-1.653	-2.2	0	1.51917	1.35808	-0.02
8443970	2006	2	2.246	1.477	1.289	-0.073	-0.102	-1.493	-1.618	-2.281	0
8443970	2006	3	1.97	1.487	1.353	-0.068	-0.107	-1.567	-1.653	-2.315	0
8443970	2006	4	1.912	1.474	1.335	-0.064	-0.1	-1.535	-1.643	-2.119	0
8443970	2006	5	1.935	1.582	1.428	0.054	0.017	-1.394	-1.541	-1.956	0
8443970	2006	6	1.816	1.556	1.392	0.036	-0.001	-1.393	-1.518	-1.825	0
8443970	2006	7	1.901	1.487	1.33	-0.025	-0.064	-1.458	-1.553	-2.046	0
8443970	2006	8	1.982	1.504	1.346	0.003	-0.034	-1.414	-1.493	-2.017	0
8443970	2006	9	1.932	1.537	1.385	0.029	-0.004	-1.393	-1.482	-2.031	0
8443970	2006	10	1.96	1.524	1.371	0.022	-0.005	-1.381	-1.505	-2.27	0
8443970	2006	11	1.929	1.548	1.406	-0.006	-0.039	-1.483	-1.591	-2.298	0
8443970	2006	12	2.076	1.479	1.3	-0.102	-0.132	-1.563	-1.697	-2.11	0
8443970	2007	1	1.853	1.439	1.265	-0.1	-0.131	-1.526	-1.639	-2.16	0	1.47633	1.32592	-0.0558333
8443970	2007	2	1.933	1.359	1.211	-0.165	-0.196	-1.603	-1.677	-2.158	0
8443970	2007	3	1.923	1.342	1.201	-0.18	-0.212	-1.624	-1.717	-2.529	0
8443970	2007	4	2.527	1.509	1.398	0.01	-0.026	-1.45	-1.534	-2.039	0
8443970	2007	5	2.137	1.467	1.324	-0.052	-0.093	-1.509	-1.633	-2.118	0
8443970	2007	6	2.05	1.582	1.416	0.045	0.01	-1.396	-1.519	-1.973	0
8443970	2007	7	1.883	1.544	1.369	-0.007	-0.045	-1.458	-1.556	-1.918	0
8443970	2007	8	1.828	1.514	1.378	-0.014	-0.056	-1.489	-1.556	-1.908	0
8443970	2007	9	1.955	1.462	1.334	-0.05	-0.089	-1.512	-1.616	-2.093	0
8443970	2007	10	2.054	1.521	1.385	0.003	-0.033	-1.45	-1.577	-2.258	0
8443970	2007	11	2.035	1.515	1.353	-0.056	-0.096	-1.544	-1.681	-2.383	0
8443970	2007	12	1.985	1.462	1.277	-0.104	-0.128	-1.532	-1.667	-2.292	0
8443970	2008	1	1.744	1.445	1.266	-0.095	-0.126	-1.517	-1.625	-2.333	0	1.49542	1.34517	-0.0351667
8443970	2008	2	1.835	1.438	1.276	-0.107	-0.141	-1.557	-1.632	-2.222	0
8443970	2008	3	1.839	1.393	1.254	-0.092	-0.125	-1.503	-1.595	-2.216	0
8443970	2008	4	1.905	1.432	1.312	-0.075	-0.112	-1.535	-1.647	-2.219	0
8443970	2008	5	2.124	1.598	1.446	0.06	0.025	-1.395	-1.517	-2.142	0
8443970	2008	6	2.095	1.573	1.408	0.006	-0.028	-1.464	-1.59	-2.206	0
8443970	2008	7	2.051	1.58	1.401	-0.019	-0.06	-1.521	-1.639	-2.218	0
8443970	2008	8	2.041	1.574	1.42	0.021	-0.021	-1.462	-1.552	-1.929	0
8443970	2008	9	1.723	1.481	1.364	-0.014	-0.05	-1.463	-1.549	-1.877	0
8443970	2008	10	1.963	1.508	1.392	0.021	-0.014	-1.42	-1.527	-1.975	0
8443970	2008	11	2.166	1.508	1.353	-0.019	-0.048	-1.449	-1.57	-2.164	0
8443970	2008	12	2.179	1.415	1.25	-0.109	-0.146	-1.541	-1.682	-2.393	0
8443970	2009	1	2.295	1.432	1.274	-0.096	-0.123	-1.519	-1.625	-2.216	0	1.5358	1.3892	-0.0025
8443970	2009	2	1.935	1.498	1.346	-0.053	-0.082	-1.509	-1.598	-2.179	0
8443970	2009	3	2.001	1.461	1.321	-0.077	-0.115	-1.55	-1.631	-2.303	0
8443970	2009	4	1.828	1.494	1.362	-0.034	-0.072	-1.506	-1.623	-2.062	0
8443970	2009	5	1.972	1.492	1.36	-0.046	-0.084	-1.528	-1.663	-2.136	0
8443970	2009	6	2.249	1.649	1.507	0.091	0.054	-1.398	-1.523	-2.036	0
8443970	2009	7	2.207	1.608	1.455	0.076	0.039	-1.376	-1.481	-2.157	0
8443970	2009	10	2.225	1.587	1.458	0.073	0.039	-1.379	-1.489	-1.884	0
8443970	2009	11	1.945	1.549	1.403	0.035	-0.002	-1.407	-1.541	-1.886	0
8443970	2009	12	2.125	1.588	1.406	0.006	-0.032	-1.469	-1.607	-2.027	0
8443970	2010	1	2.447	1.682	1.5	0.053	0.011	-1.478	-1.58	-2.477	0	1.63517	1.48608	0.0635
8443970	2010	2	2.189	1.659	1.52	0.102	0.072	-1.376	-1.46	-2.355	0
8443970	2010	3	2.335	1.777	1.643	0.163	0.118	-1.406	-1.502	-2.027	0
8443970	2010	4	2.155	1.65	1.517	0.075	0.032	-1.452	-1.564	-1.997	0
8443970	2010	5	2.06	1.598	1.44	0.029	-0.012	-1.463	-1.591	-1.9	0
8443970	2010	6	1.958	1.617	1.458	0.058	0.02	-1.417	-1.526	-1.961	0
8443970	2010	7	2.015	1.564	1.408	0.028	-0.015	-1.438	-1.52	-2.011	0
8443970	2010	8	2.066	1.562	1.421	0.029	-0.008	-1.437	-1.5	-2.053	0
8443970	2010	9	2.106	1.601	1.453	0.044	0.004	-1.445	-1.531	-2.061	0
8443970	2010	10	2.12	1.597	1.459	0.058	0.024	-1.41	-1.506	-2.121	0
8443970	2010	11	2.258	1.612	1.484	0.044	0.009	-1.465	-1.582	-2.205	0
8443970	2010	12	2.497	1.703	1.53	0.079	0.051	-1.428	-1.544	-2.004	0
8443970	2011	1	2.297	1.614	1.45	0.003	-0.032	-1.514	-1.617	-2.218	0	1.57742	1.44575	0.0245
8443970	2011	2	2.139	1.54	1.399	-0.03	-0.065	-1.528	-1.596	-2.25	0
8443970	2011	3	2.148	1.488	1.37	-0.048	-0.086	-1.543	-1.609	-2.296	0
8443970	2011	4	2.111	1.532	1.419	-0.003	-0.043	-1.505	-1.589	-2.308	0
8443970	2011	5	2.172	1.615	1.483	0.081	0.043	-1.396	-1.509	-2.096	0
8443970	2011	6	2.112	1.644	1.498	0.096	0.057	-1.383	-1.483	-1.869	0
8443970	2011	7	1.972	1.624	1.472	0.063	0.019	-1.434	-1.516	-1.824	0
8443970	2011	8	1.943	1.633	1.514	0.082	0.036	-1.442	-1.499	-2.08	0
8443970	2011	9	2.183	1.583	1.477	0.03	-0.006	-1.488	-1.556	-2.076	0
8443970	2011	10	2.192	1.653	1.533	0.097	0.057	-1.418	-1.519	-2.213	0
8443970	2011	11	2.206	1.536	1.404	-0.02	-0.056	-1.515	-1.628	-2.261	0
8443970	2011	12	2.136	1.467	1.33	-0.057	-0.089	-1.507	-1.625	-2.128	0
8443970	2012	1	2.216	1.482	1.311	-0.081	-0.114	-1.538	-1.654	-2.118	0	1.55083	1.42	0.00641667
8443970	2012	2	1.848	1.472	1.325	-0.079	-0.112	-1.548	-1.627	-1.947	0
8443970	2012	3	1.76	1.44	1.332	-0.059	-0.094	-1.519	-1.61	-2.284	0
8443970	2012	4	2.088	1.53	1.437	0.028	-0.012	-1.46	-1.553	-2.073	0
8443970	2012	5	2.083	1.54	1.414	-0.015	-0.056	-1.525	-1.643	-2.262	0
8443970	2012	6	2.461	1.688	1.54	0.106	0.069	-1.402	-1.518	-1.973	0
8443970	2012	7	2.128	1.629	1.473	0.035	-0.003	-1.479	-1.575	-2.049	0
8443970	2012	8	1.966	1.594	1.454	0.023	-0.02	-1.493	-1.572	-1.907	0
8443970	2012	9	1.92	1.49	1.389	-0.014	-0.054	-1.496	-1.563	-1.98	0
8443970	2012	10	2.254	1.56	1.453	0.061	0.027	-1.399	-1.504	-2.056	0
8443970	2012	11	2.189	1.587	1.453	0.024	-0.014	-1.48	-1.608	-2.281	0
8443970	2012	12	2.273	1.598	1.459	0.048	0.015	-1.429	-1.553	-2.288	0
8443970	2013	1	2.146	1.458	1.321	-0.104	-0.138	-1.598	-1.68	-2.228	0	1.57555	1.45245	0.00318182
8443970	2013	2	2.306	1.55	1.406	-0.049	-0.084	-1.575	-1.676	-2.1	0
8443970	2013	3	2.237	1.718	1.606	0.103	0.055	-1.495	-1.566	-2.079	0
8443970	2013	4	2.117	1.559	1.452	-0.038	-0.083	-1.618	-1.71	-2.244	0
8443970	2013	5	2.227	1.578	1.466	-0.02	-0.064	-1.593	-1.697	-2.236	0
8443970	2013	6	2.169	1.664	1.532	0.052	0.01	-1.512	-1.617	-2.256	0
8443970	2013	7	2.263	1.645	1.515	0.064	0.021	-1.473	-1.558	-2.057	0
8443970	2013	8	2.047	1.593	1.461	0.037	-0.001	-1.463	-1.547	-2.11	0
8443970	2013	9	1.862	1.55	1.443	0.03	-0.008	-1.46	-1.533	-1.995	0
8443970	2013	10	1.941	1.532	1.432	0.029	-0.004	-1.441	-1.542	-1.884	0
8443970	2013	11	1.945	1.484	1.343	-0.069	-0.107	-1.556	-1.681	-2.088	0
8443970	2013	12	2.156	1.557	1.401	-0.065	-0.102	-1.604	-1.732	-2.403	0
8443970	2014	1	2.539	1.576	1.409	-0.076	-0.122	-1.652	-1.772	-2.462	0	1.58736	1.45909	-0.00172727
8443970	2014	2	1.947	1.487	1.348	-0.114	-0.151	-1.649	-1.745	-2.458	0
8443970	2014	3	2.175	1.536	1.425	-0.068	-0.114	-1.653	-1.72	-2.399	0
8443970	2014	4	2.083	1.588	1.481	-0.008	-0.054	-1.589	-1.673	-2.043	0
8443970	2014	5	1.934	1.635	1.508	0.044	-0.002	-1.512	-1.627	-2.035	0
8443970	2014	6	2.139	1.628	1.49	0.046	-0.001	-1.492	-1.597	-2.055	0
8443970	2014	7	2.106	1.591	1.45	0.008	-0.038	-1.526	-1.608	-2.234	0
8443970	2014	8	2.081	1.59	1.472	0.035	-0.01	-1.491	-1.546	-2.187	0
8443970	2014	9	2.028	1.57	1.453	0.01	-0.031	-1.514	-1.572	-2.111	0
8443970	2014	10	2.082	1.662	1.55	0.102	0.069	-1.412	-1.492	-2.077	0
8443970	2014	11	2.059	1.598	1.464	0.002	-0.035	-1.533	-1.643	-2.093	0
8443970	2014	12	2.082	1.612	1.48	0.004	-0.029	-1.538	-1.643	-2.206	0
8443970	2015	1	2.471	1.506	1.356	-0.089	-0.128	-1.611	-1.726	-2.244	0	1.53018	1.421	-0.0313636
8443970	2015	2	2.24	1.519	1.394	-0.086	-0.127	-1.648	-1.737	-2.642	0
8443970	2015	3	2.063	1.376	1.291	-0.161	-0.197	-1.684	-1.752	-2.474	0
8443970	2015	4	2.137	1.5	1.41	-0.052	-0.096	-1.601	-1.678	-2.282	0
8443970	2015	5	1.945	1.458	1.355	-0.082	-0.126	-1.606	-1.695	-2.161	0
8443970	2015	6	1.823	1.555	1.428	-0.003	-0.045	-1.518	-1.614	-1.926	0
8443970	2015	7	1.914	1.645	1.511	0.065	0.021	-1.468	-1.549	-1.989	0
8443970	2015	8	1.997	1.616	1.507	0.032	-0.017	-1.54	-1.596	-2.112	0
8443970	2015	9	2.112	1.562	1.477	0.027	-0.015	-1.507	-1.566	-2.263	0
8443970	2015	10	2.182	1.603	1.509	0.046	0.009	-1.49	-1.57	-2.295	0
8443970	2015	11	1.881	1.492	1.393	-0.042	-0.078	-1.549	-1.665	-2.414	0
8443970	2015	12	1.981	1.518	1.394	-0.02	-0.054	-1.501	-1.624	-2.046	0
														se
												ave MHW	1.38167	0.0130409	1999-2015
												range MHW	1.31425	1.48608
													2004	2010

[truncated: 1 more sheets: Weather monthly means]
